# Supplementary material
Source: PubMed Central journal article supplement (PMC4623589)
Supplement: NIHMS731957-supplement-supporting_information.pdf [file NIHMS731957-supplement-supporting_information.pdf]

# Supporting Information: Correlation of Thermal Stability and Structural Distortion of DNA Interstrand Cross-links Produced From Oxidized Abasic Sites With Their Selective Formation and Repair

Souradyuti Ghosh and Marc M. Greenberg\*

Department of Chemistry  
Johns Hopkins University  
3400 N. Charles St.  
Baltimore, MD 21218

[mgreenberg@jhu.edu](mailto:mgreenberg@jhu.edu); phone: 410-516-8095

## Contents:

1. General methods and experimental procedures. (S2-13)
2. **Figure S1.** Oligonucleotides used to prepare **1** and **2**. (S2)
3. **Scheme S1.** Preparation of 5'-<sup>32</sup>P-b-**1** and 5'-<sup>32</sup>P-b-**2**. (S2)
4. **Scheme S2.** Preparation of 3'-<sup>32</sup>P-b-**1** and 3'-<sup>32</sup>P-b-**2**. (S3)
5. **Scheme S3.** Preparation of 3'-<sup>32</sup>P-t-**1** and 3'-<sup>32</sup>P-t-**2**. (S4)
6. **Scheme S4.** Preparation of 5'-<sup>32</sup>P-t-**1** and 5'-<sup>32</sup>P-t-**2**. (S5)
7. **Figure S2.** Oligonucleotides used to prepare **8** and **9**. (S6)
8. **Scheme S5.** Preparation of 5'-<sup>32</sup>P-b-**8** and 5'-<sup>32</sup>P-b-**9**. (S6)
9. **Scheme S6.** Preparation of 3'-<sup>32</sup>P-b-**8** and 3'-<sup>32</sup>P-b-**9**. (S8)
10. **Scheme S7.** Preparation of 5'-<sup>32</sup>P-t-**8** and 5'-<sup>32</sup>P-t-**9**. (S9)
11. **Scheme S8.** Preparation of 3'-<sup>32</sup>P-t-**8** and 3'-<sup>32</sup>P-t-**9**. (S10)
12. **Scheme S9.** Preparation of 5'-<sup>32</sup>P-b-**11** and 5'-<sup>32</sup>P-b-**12**. (S11)
13. **Figure S3.** UV-melting of DOB ICL analogues **S14** and **S15**. (S13)
14. **Figure S4.** ESI-MS of **13**. (S13)
15. **Figure S5.** ESI-MS of **14**. (S14)
16. **Figure S6.** ESI-MS of **S6**. (S15)
17. **Figure S7.** Representative autoradiogram of DEPC reaction with 5'-<sup>32</sup>P-b-**1-3**. (S16)
18. **Figure S8.** Representative autoradiogram of DMS reaction with 5'-<sup>32</sup>P-b-**1-3**. (S17)
19. **Figure S9.** Representative autoradiogram of DEPC reaction with 3'-<sup>32</sup>P-b-**1-3**. (S18)
20. **Figure S10.** Representative autoradiogram of KMnO<sub>4</sub> reaction with 5'-<sup>32</sup>P-t-**1-3**. (S19)
21. **Figure S11.** Representative autoradiogram of KMnO<sub>4</sub> reaction with 3'-<sup>32</sup>P-t-**1-3**. (S20)
22. **Figure S12.** Representative autoradiogram of hydroxylamine reaction with 3'-<sup>32</sup>P-t-**1-3**. (S21)
23. **Figure S13.** Representative autoradiogram of DMS reaction with 3'-<sup>32</sup>P-t-**1-3**. (S22)
24. **Figure S14.** Representative autoradiogram of KMnO<sub>4</sub> reaction with 5'-<sup>32</sup>P-b-**10-12**. (S23)
25. **Figure S15.** Representative autoradiogram of DEPC reaction with 5'-<sup>32</sup>P-b-**10-12**. (S24)
26. **Figure S16.** Representative autoradiogram of DEPC reaction with 3'-<sup>32</sup>P-b-**10-12**. (S25)
27. **Figure S17.** Representative autoradiogram of KMnO<sub>4</sub> reaction with 3'-<sup>32</sup>P-b-**10-12**. (S26)
28. **Figure S18.** Representative autoradiogram of DEPC reaction with 5'-<sup>32</sup>P-t-**8-10**. (S27)
29. **Figure S19.** Representative autoradiogram of KMnO<sub>4</sub> reaction with 5'-<sup>32</sup>P-t-**8-10**. (S28)
30. **Figure S20.** Representative autoradiogram of KMnO<sub>4</sub> reaction with 3'-<sup>32</sup>P-t-**8-10**. (S29)
31. **Figure S21.** Representative autoradiogram of DEPC reaction with 3'-<sup>32</sup>P-t-**8-10**. (S30)
32. **Figure S22.** Representative autoradiogram of OH• reaction with 3'-<sup>32</sup>P-t-**8-10**. (S31)
33. **Figure S23.** Representative autoradiogram of OH• reaction with 3'-<sup>32</sup>P-t-**8-10**. (S32)

**General Methods.** Syntheses of cross-linked oligonucleotides (**S1** and **S2**) was previously reported.<sup>1</sup> Oligonucleotides containing native nucleotides were deprotected using 1:1 mixture of aqueous methylamine (40%)-concentrated NH<sub>4</sub>OH at 55 °C for 1 h. Oligonucleotides were purified by 20% denaturing polyacrylamide gel electrophoresis (PAGE), isolated by the crush and soak method, and desalted using C-18-Sep-Pak cartridges (Waters).

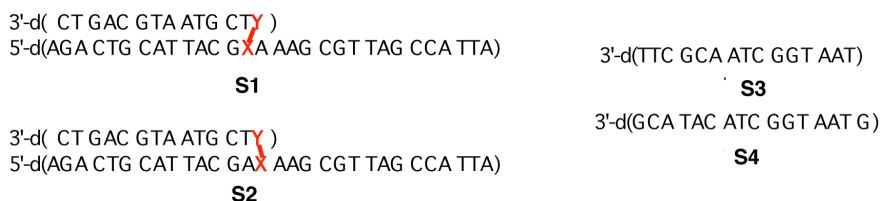

**Figure S1.** Oligonucleotides used to prepare **1** and **2**.

**Scheme S1.** Preparation of 5'-<sup>32</sup>P-b-**1** and 5'-<sup>32</sup>P-b-**2**.

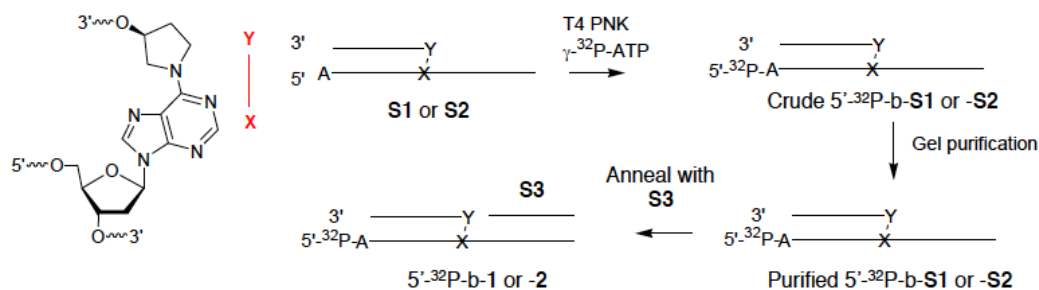

*Preparation of 5'-<sup>32</sup>P-b-**1** and 5'-<sup>32</sup>P-b-**2** (Scheme S1).* Oligonucleotide **S1** or **S2** (50 pmol, Figure S1) was 5'-<sup>32</sup>P-labeled in reaction (80  $\mu$ L) containing 1  $\times$  T4 PNK buffer (70 mM Tris•HCl pH 7.6, 10 mM MgCl<sub>2</sub>, 5 mM DTT), 50  $\mu$ Ci  $\gamma$ -<sup>32</sup>P-ATP, and 30 U of T4 PNK at 37 °C for 2 h. The phosphorylation reaction was stopped by heating at 65 °C for 30 min. Excess  $\gamma$ -<sup>32</sup>P-ATP was removed by passing the reaction through a 1 mL Sephadex G25 column. The specific activity was determined by counting the radioactivity (using a liquid scintillation counter) and assuming hundred percent recovery of the radiolabeled cross-linked substrate. Formamide

loading buffer (50  $\mu$ L, 90% formamide, 10 mM EDTA, pH 8.0) was added to the recovered substrate, followed by heating at 90  $^{\circ}$ C for 5 min and cooling on ice prior to purification by 20% denaturing PAGE (37  $\times$  32  $\times$  0.04 cm). The gel was run under limiting power (55 W) for 8 h. The product band was excised from the gel, crushed, and the DNA was eluted overnight in 1 mL of elution buffer (0.2 M NaCl and 1 mM EDTA). The supernatant was desalted using a 100 mg C-18-Sep-Pak cartridge, concentrated and then hybridized with **S3** (Figure S1) by slow cooling from 90  $^{\circ}$ C to 25  $^{\circ}$ C in 1  $\times$  PBS buffer (10 mM sodium phosphate, pH 7.2, 100 mM NaCl) to provide 5'- $^{32}$ P-b-1 and 5'- $^{32}$ P-b-2. The yield (30-50%) was determined based on the specific activity of 5'- $^{32}$ P-labeled **S1** and **S2**.

**Scheme S2.** Preparation of 3'- $^{32}$ P-b-1 and 3'- $^{32}$ P-b-2.

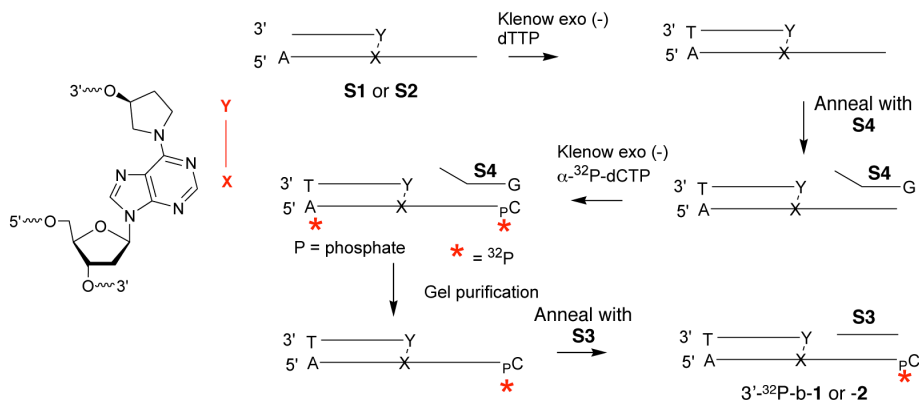

*Preparation of 3'- $^{32}$ P-b-1 and 3'- $^{32}$ P-b-2 (Scheme S2).* Oligonucleotide **S1** or **S2** (50 pmol, Figure S1) was subjected to a “fill-in” reaction (30  $\mu$ L) containing 1  $\times$  NEB 2.0 buffer (50 mM NaCl, 10 mM Tris•HCl, 10 mM MgCl<sub>2</sub>, 1 mM DTT, pH 7.9), dTTP (1 mM), and 30 U of Klenow exo(-) at 37  $^{\circ}$ C for 3 h. The reaction was stopped by heating at 75  $^{\circ}$ C for 30 min. The reaction was then added and hybridized with **S4** (100 pmol, Figure S1) in 10 mM sodium phosphate (pH 7.2) and 100 mM sodium chloride solution (100  $\mu$ L) by slowly cooling from 90  $^{\circ}$ C to 16  $^{\circ}$ C. The annealed substrate was then 3'- $^{32}$ P-labeled in its bottom strand using a fill-in

reaction (150  $\mu$ L) containing 1  $\times$  NEB 2.0 buffer (50 mM NaCl, 10 mM TRIS-HCl, 10 mM MgCl<sub>2</sub>, 1 mM DTT, pH 7.9), 30  $\mu$ Ci  $\alpha$ -<sup>32</sup>P-dCTP, and 30 U of Klenow exo(-) at 37 °C for 3 h. The reaction was stopped by heating at 75 °C for 30 min. Excess  $\alpha$ -<sup>32</sup>P-dCTP was removed by passing the reaction through a 1 mL Sephadex G25 column. The specific activity was determined by counting the radioactivity (using a liquid scintillation counter) and assuming hundred percent recovery of the radiolabeled cross-linked substrate. Formamide loading buffer (50  $\mu$ L, 90% formamide, 10 mM EDTA, pH 8.0) was added to the recovered substrate, followed by heating at 90 °C for 5 min and cooling on ice prior to purification by 20% denaturing PAGE (37  $\times$  32  $\times$  0.04 cm). The gel was run under limiting power (55 W) for 8 h. The product band was excised from the gel, crushed, and the DNA was eluted overnight in 1 mL of elution buffer (0.2 M NaCl and 1 mM EDTA). The supernatant was desalted using a 100 mg C-18-Sep-Pak cartridge, concentrated and then hybridized with **S3** (Figure S1) by slow cooling from 90 °C to 25 °C in 1  $\times$  PBS buffer (10 mM sodium phosphate, pH 7.2, 100 mM NaCl) to provide 3'-<sup>32</sup>P-b-1 and 3'-<sup>32</sup>P-b-2. The yields (30-50%) of 3'-<sup>32</sup>P-b-1 -2 were determined based on the specific activity of 3'-<sup>32</sup>P-labeled **S1** and **S2**.

**Scheme S3.** Preparation of 3'-<sup>32</sup>P-t-1 and 3'-<sup>32</sup>P-t-2.

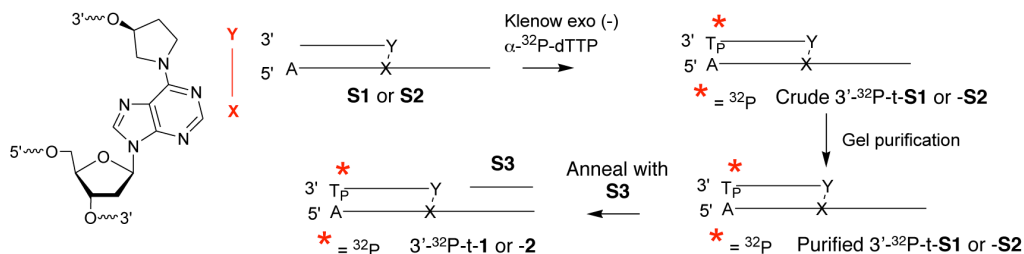

*Preparation of 3'-<sup>32</sup>P-t-1 and 3'-<sup>32</sup>P-t-2 (Scheme S3).* Oligonucleotide **S1** or **S2** (50 pmol, Figure S1) was subjected to reaction (50  $\mu$ L) containing 1  $\times$  NEB 2.0 buffer (50 mM NaCl, 10

mM Tris•HCl, 10 mM MgCl<sub>2</sub>, 1 mM DTT, pH 7.9), 30 μCi α-<sup>32</sup>P-dTTP, and 30 U of Klenow exo(-) at 37 °C for 3 h. The fill-in reaction was stopped by heating at 75 °C for 30 min. The specific activity was determined by counting the radioactivity (using a liquid scintillation counter) and assuming hundred percent recovery of the radiolabeled cross-linked substrate. Formamide loading buffer (50 μL, 90% formamide, 10 mM EDTA, pH 8.0) was added to the recovered substrate, followed by heating at 90 °C for 5 min and cooling on ice prior to purification by 20% denaturing PAGE (37 × 32 × 0.04 cm). The gel was run under limiting power (55 W) for 8 h. The product band was excised from the gel, crushed, and the DNA was eluted overnight in 1 mL of elution buffer (0.2 M NaCl and 1 mM EDTA). The supernatant was desalted using a 100 mg C-18-Sep-Pak cartridge, concentrated and then hybridized with **S3** (Figure 76) by slow cooling from 90 °C to 25 °C in 1 × PBS buffer (10 mM sodium phosphate, pH 7.2, 100 mM NaCl) to provide 3'-<sup>32</sup>P-t-1 and 3'-<sup>32</sup>P-t-2. The yield (30-50%) of 3'-<sup>32</sup>P-t-1 and 3'-<sup>32</sup>P-t-2 were determined based on the specific activity of 3'-<sup>32</sup>P-labeled **S1** and **S2**.

**Scheme S4.** Preparation of 5'-<sup>32</sup>P-t-1 and 5'-<sup>32</sup>P-t-2.

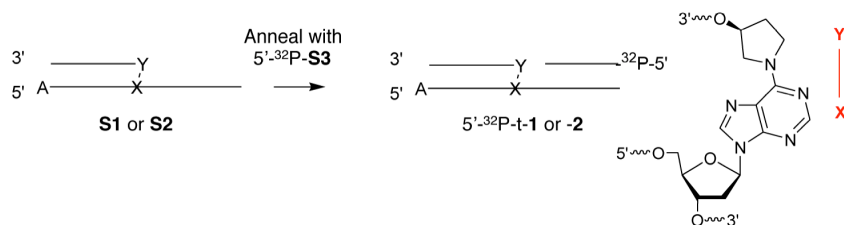

*Preparation of 5'-<sup>32</sup>P-t-1 and 5'-<sup>32</sup>P-t-2 (Scheme S4).* Oligonucleotide **S3** (30 pmol, Figure S1) was 5'-<sup>32</sup>P-labeled in a reaction (50 μL) containing 1 × T4 PNK buffer (70 mM Tris•HCl pH 7.6, 10 mM MgCl<sub>2</sub>, 5 mM DTT), 50 μCi γ-<sup>32</sup>P-ATP, and 30 U of T4 PNK at 37 °C for 2 h. The phosphorylation reaction was stopped by heating at 65 °C for 30 min. Excess γ-<sup>32</sup>P-

ATP was removed by passing the reaction through a 1 mL Sephadex G25 column. The specific activity was determined by counting the radioactivity (using a liquid scintillation counter) and measuring the absorption ( $A_{260}$ ) of 5'-<sup>32</sup>P-S3. Oligonucleotide 5'-<sup>32</sup>P-S3 was hybridized with with S1 or S2 (60 pmol, Figure S1) by slow cooling from 90 °C to 25 °C in 1 × PBS buffer (10 mM sodium phosphate, pH 7.2, 100 mM NaCl) to provide 5'-<sup>32</sup>P-t-1 and 5'-<sup>32</sup>P-t-2.

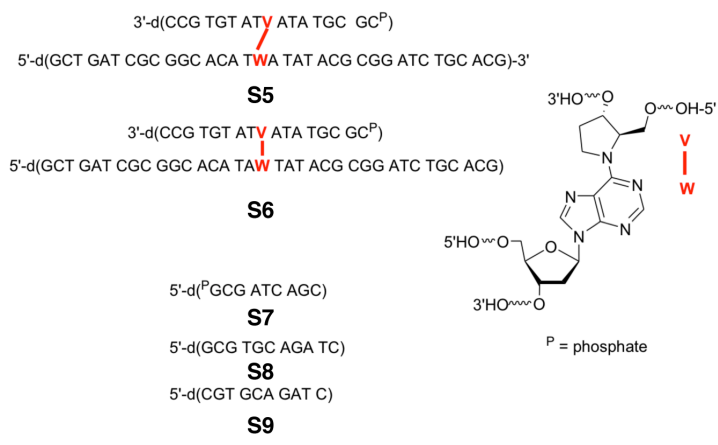

**Figure S2.** Oligonucleotides used to prepare 8 and 9.

**Scheme S5.** Preparation of 5'-<sup>32</sup>P-b-8 and 5'-<sup>32</sup>P-b-9.

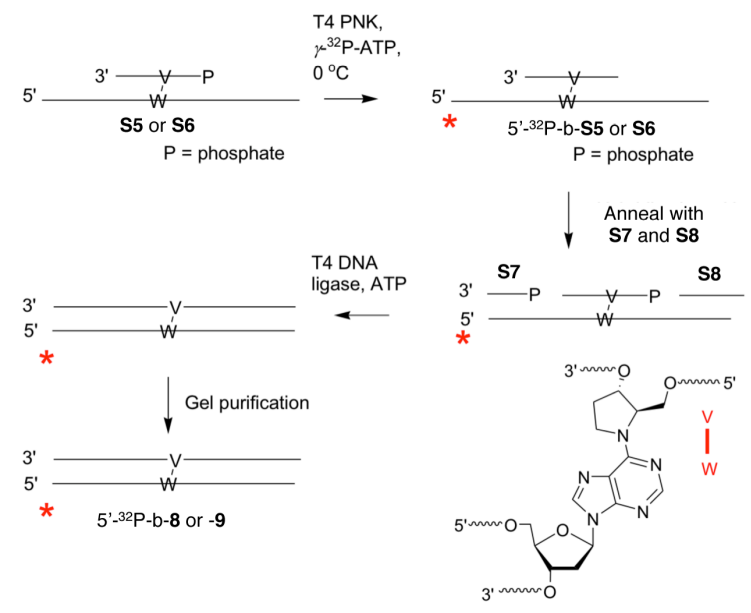

*Preparation of 5'-<sup>32</sup>P-b-8 and 5'-<sup>32</sup>P-b-9 (Scheme S5).* Oligonucleotide **S5** or **S6** (80 pmol, Figure S2) was 5'-<sup>32</sup>P-labeled in a reaction (50  $\mu$ L) containing 1  $\times$  T4 PNK buffer (70 mM Tris•HCl pH 7.6, 10 mM MgCl<sub>2</sub>, 5 mM DTT), 6% PEG 8000 solution (w/v), 50  $\mu$ Ci  $\gamma$ -<sup>32</sup>P-ATP, and 30 U of T4 PNK at 0 °C for 2 h. Excess  $\gamma$ -<sup>32</sup>P-ATP was removed by passing the reaction through a 1 mL Sephadex G25 column. The phosphorylation reaction was stopped by heating at 65 °C for 30 min and the T4 PNK was removed by phenol-chloroform-isopropanol extraction. 5'-<sup>32</sup>P-b-**S5** or 5'-<sup>32</sup>P-b-**S6** was hybridized with **S7** and **S8** (160 pmol each) in 10 mM sodium phosphate (pH 7.2) and 100 mM sodium chloride solution (120  $\mu$ L) by slowly cooling from 90 °C to 16 °C. The reaction was incubated overnight at 16 °C in presence of T4 DNA ligase (50 U) and 1  $\times$  ligase buffer (50 mM Tris•HCl pH 7.5, 10 mM MgCl<sub>2</sub>, 10 mM DTT, 1 mM ATP). Formamide loading buffer (50  $\mu$ L, 90% formamide, 10 mM EDTA, pH 8.0) was added to the reaction, followed by heating at 90 °C for 5 min and cooling on ice prior to purification by 20% denaturing PAGE (37  $\times$  32  $\times$  0.04 cm). The gel was run under limiting power (55 W) for 11 h. The product band was excised from the gel, crushed, and the DNA was eluted overnight in 1 mL of elution buffer (0.2 M NaCl and 1 mM EDTA). The supernatant was desalted using a 100 mg C-18-Sep-Pak cartridge to provide 5'-<sup>32</sup>P-b-**8** or 5'-<sup>32</sup>P-b-**9**. The isolated final products were suspended in  $\times$  PBS buffer (10 mM sodium phosphate, pH 7.2, 100 mM NaCl) and hybridized by slow cooling from 90 °C to 25 °C.

**Scheme S6.** Preparation of 3'-<sup>32</sup>P-b-8 and 3'-<sup>32</sup>P-b-9.

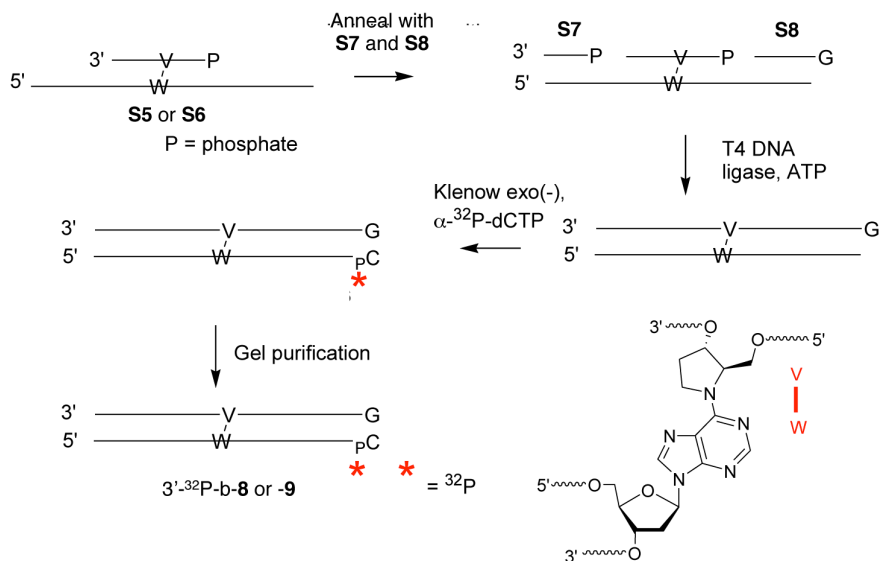

*Preparation of 3'-<sup>32</sup>P-b-8 and 3'-<sup>32</sup>P-b-9 (Scheme S6).* Oligonucleotide **S5** or **S6** (50 pmol) was annealed with **S7** and **S8** (100 pmol) in 10 mM sodium phosphate (pH 7.2) and 100 mM sodium chloride solution (50  $\mu$ L) by slowly cooling from 90 °C to 16 °C. The reaction was incubated overnight at 16 °C in presence of T4 DNA ligase (50 U) and 1  $\times$  ligase buffer (50 mM Tris•HCl pH 7.5, 10 mM MgCl<sub>2</sub>, 10 mM DTT, 1 mM ATP). The ligated substrates were subjected to a fill-in reaction (100  $\mu$ L) containing 1  $\times$  NEB 2.0 buffer (50 mM NaCl, 10 mM Tris•HCl, 10 mM MgCl<sub>2</sub>, 1 mM DTT, pH 7.9), dTTP (1 mM), and 30 U of Klenow exo(-) at 37 °C for 3 h. The fill-in reaction was stopped by heating at 75 °C for 30 min. Excess  $\gamma$ -<sup>32</sup>P-ATP was removed by passing the reaction through a 1 mL Sephadex G25 column. The specific activity was determined by counting the radioactivity (using a liquid scintillation counter) and assuming hundred percent recovery from the Sephadex column. Formamide loading buffer (50  $\mu$ L, 90% formamide, 10 mM EDTA, pH 8.0) was added the <sup>32</sup>P-labeled substrates, followed by heating at 90 °C for 5 min and cooling on ice prior to purification by 20% denaturing PAGE (37



× 32 × 0.04 cm). The gel was run under limiting power (55 W) for 11 h. The product band was excised from the gel, crushed, and the DNA was eluted overnight in 5 mL of elution buffer (0.2 M NaCl and 1 mM EDTA). The supernatant was desalted using a 100 mg C-18-Sep-Pak cartridge to provide 3'-<sup>32</sup>P-b-8 or 3'-<sup>32</sup>P-b-9. The isolated final products were suspended in × PBS buffer (10 mM sodium phosphate, pH 7.2, 100 mM NaCl) and hybridized by slow cooling from 90 °C to 25 °C. The yields (4-10%) of purified 3'-<sup>32</sup>P-b-8 and 3'-<sup>32</sup>P-b-9 was determined based on the specific activity of crude substrates.

**Scheme S7.** Preparation of 5'-<sup>32</sup>P-t-8 and 5'-<sup>32</sup>P-t-9.

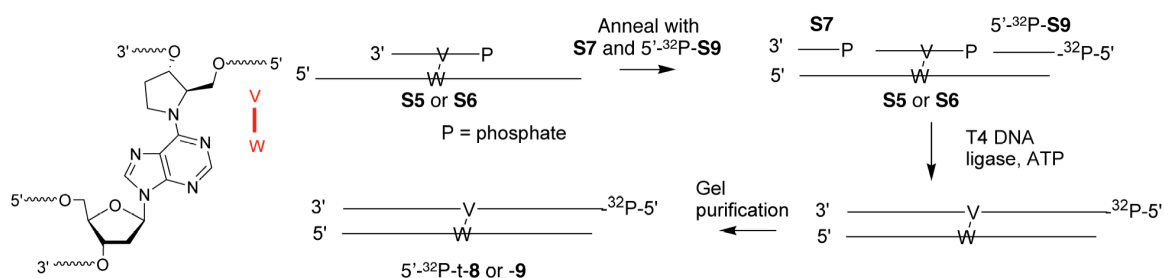

*Preparation of 5'-<sup>32</sup>P-t-8 and 5'-<sup>32</sup>P-t-9 (Scheme S7).* **S9** (80 pmol) was 5'-<sup>32</sup>P-labeled in a reaction (50 μL) containing 1 × T4 PNK buffer (70 mM Tris•HCl pH 7.6, 10 mM MgCl<sub>2</sub>, 5 mM DTT), 6% PEG 8000 solution (w/v), 50 μCi γ-<sup>32</sup>P-ATP, and 30 U of T4 PNK at 37 °C for 2 h. The phosphorylation reaction was stopped by heating at 65 °C for 30 min. Excess γ-<sup>32</sup>P-ATP was removed by passing the reaction through a 1 mL Sephadex G25 column. The specific activity was determined by counting the radioactivity (using a liquid scintillation counter) and measuring the concentration of **S9** ( $A_{260}$ ,  $\epsilon = 94900 \text{ L}\cdot\text{mol}^{-1}\cdot\text{cm}^{-1}$ ). 5'-<sup>32</sup>P-**S9** was hybridized with 50 pmol of **S5** or **S6** and 160 pmol of **S7** in 10 mM sodium phosphate (pH 7.2) and 100 mM sodium chloride solution (120 μL) by slowly cooling from 90 °C to 16 °C. The reaction was incubated

overnight at 16 °C in presence of T4 DNA ligase (50 U) and 1 × ligase buffer (50 mM Tris•HCl pH 7.5, 10 mM MgCl<sub>2</sub>, 10 mM DTT, 1 mM ATP). Formamide loading buffer (50 μL, 90% formamide, 10 mM EDTA, pH 8.0) was added to the reaction, followed by heating at 90 °C for 5 min and cooling on ice prior to purification by 20% denaturing PAGE (37 × 32 × 0.04 cm). The gel was run under limiting power (55 W) for 11 h. The product band was excised from the gel, crushed, and the DNA was eluted overnight in 1 mL of elution buffer (0.2 M NaCl and 1 mM EDTA). The supernatant was desalted using a 100 mg C-18-Sep-Pak cartridge to provide 5'-<sup>32</sup>P-t-8 or 5'-<sup>32</sup>P-t-9. The isolated final products were suspended in × PBS buffer (10 mM sodium phosphate, pH 7.2, 100 mM NaCl) and hybridized by slow cooling from 90 °C to 25 °C. The yield (4–10%) of 5'-<sup>32</sup>P-t-8 and 5'-<sup>32</sup>P-t-9 was determined based on the specific activity of 5'-<sup>32</sup>P-S9.

**Scheme S8.** Preparation of 3'-<sup>32</sup>P-t-8 and 3'-<sup>32</sup>P-t-9.

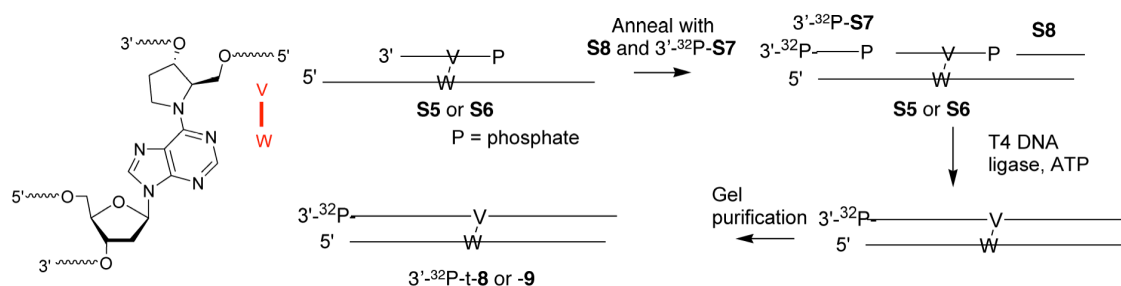

*Preparation of 3'-<sup>32</sup>P-t-8 and 3'-<sup>32</sup>P-t-9 (Scheme S8).* S7 (80 pmol) was 3'-<sup>32</sup>P-labeled in a reaction (50 μL) containing containing 1 × TdT buffer buffer (50 mM KOAc, 20 mM Tris•OAc, 10 mM MgCl<sub>2</sub>, pH 7.9), 40 μCi α-<sup>32</sup>P-cordycepin triphosphate, and 30 U of terminal deoxynucleotidyl transferase at 37 °C for 2 h. Excess α-<sup>32</sup>P-cordycepin triphosphate was removed by passing the reaction through a 1 mL Sephadex G25 column. The specific activity

was determined by counting the radioactivity (using a liquid scintillation counter) and measuring the concentration of **S7** ( $A_{260}$ ,  $\epsilon = 86300 \text{ L}\cdot\text{mol}^{-1}\cdot\text{cm}^{-1}$ ).  $3'$ - $^{32}\text{P}$ -**S7** and **S8** were hybridized with **S5** or **S6** (50 pmole) in 10 mM sodium phosphate (pH 7.2) and 100 mM sodium chloride solution (100  $\mu\text{L}$ ) by slowly cooling from 90  $^{\circ}\text{C}$  to 16  $^{\circ}\text{C}$ . The reaction was incubated overnight at 16  $^{\circ}\text{C}$  in presence of T4 DNA ligase (50 U) and 1  $\times$  ligase buffer (50 mM Tris $\cdot$ HCl pH 7.5, 10 mM  $\text{MgCl}_2$ , 10 mM DTT, 1 mM ATP). Formamide loading buffer (50  $\mu\text{L}$ , 90% formamide, 10 mM EDTA, pH 8.0) was added to the reaction, followed by heating at 90  $^{\circ}\text{C}$  for 5 min and cooling on ice prior to purification by 20% denaturing PAGE (37  $\times$  32  $\times$  0.04 cm). The gel was run under limiting power (55 W) for 11 h. The product band was excised from the gel, crushed, and the DNA was eluted overnight in 1 mL of elution buffer (0.2 M NaCl and 1 mM EDTA). The supernatant was desalted using a 100 mg C-18-Sep-Pak cartridge to provide  $3'$ - $^{32}\text{P}$ -**t-8** or  $3'$ - $^{32}\text{P}$ -**t-9**. The isolated final products were suspended in  $\times$  PBS buffer (10 mM sodium phosphate, pH 7.2, 100 mM NaCl) and hybridized by slow cooling from 90  $^{\circ}\text{C}$  to 25  $^{\circ}\text{C}$ . The yield (4–10%) of  $3'$ - $^{32}\text{P}$ -**t-8** and  $3'$ - $^{32}\text{P}$ -**t-9** was determined based on the specific activity of  $3'$ - $^{32}\text{P}$ -**S7**.

**Scheme S9.** Preparation of  $5'$ - $^{32}\text{P}$ -**b-11** and  $5'$ - $^{32}\text{P}$ -**b-12**.

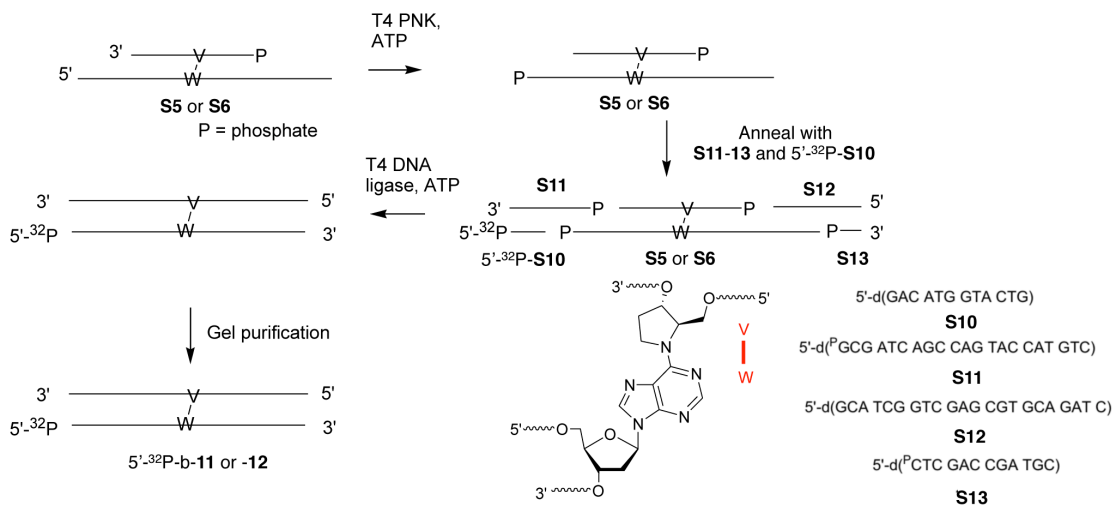

*Preparation of 5'-<sup>32</sup>P-b-11 and 5'-<sup>32</sup>P-b-12 (Scheme S9).* **S10** (80 pmol) was 5'-<sup>32</sup>P-labeled in a reaction (80 μL) containing 1 × T4 PNK buffer (70 mM TRIS-HCl pH 7.6, 10 mM MgCl<sub>2</sub>, 5 mM DTT), 6% PEG 8000 solution (w/v), 50 μCi γ-<sup>32</sup>P-ATP, and 30 U of T4 PNK at 37 °C for 1 h. Excess γ-<sup>32</sup>P-ATP was removed by passing the reaction through a 1 mL Sephadex G25 column. The specific activity was determined by counting the radioactivity (using a liquid scintillation counter) and measuring the concentration of 5'-<sup>32</sup>P-**S10** (A<sub>260</sub>, ε = 119700 L•mol<sup>-1</sup>•cm<sup>-1</sup>). Separately, **S5** or **S6** (40 pmol) was 5'-phosphorylated on the template strand in a 25 μL reaction containing 1 × T4 PNK buffer, ATP (80 pmol), and 30 U of T4 PNK at 37 °C for 1 h. Both phosphorylation reactions were stopped by heating at 65 °C for 30 min. The phosphorylated products were hybridized with 160 pmol each of **S11**, **S12**, and **S13** in 10 mM sodium phosphate (pH 7.2) and 100 mM sodium chloride solution by slowly cooling from 90 °C to 16 °C. The reaction was incubated overnight at 16 °C in presence of T4 DNA ligase (50 U) and 1 × ligase buffer (50 mM Tris-HCl pH 7.5, 10 mM MgCl<sub>2</sub>, 10 mM DTT, 1 mM ATP). Formamide loading buffer (50 μL, 90% formamide, 10 mM EDTA, pH 8.0) was added, followed by heating at 90 °C for 5 min and cooling on ice prior to purification by 20% denaturing PAGE (37 × 32 × 0.04 cm). The gel was run under limiting power (55 W) for 18 h. The product band was excised from the gel, crushed, and the DNA was eluted overnight in 5 mL of elution buffer (0.2 M NaCl and 1 mM EDTA). The supernatant was desalted using a 100 mg C-18-Sep-Pak cartridge to provide 5'-<sup>32</sup>P-b-11 or 5'-<sup>32</sup>P-b-12. The yield (10-20%) of 5'-<sup>32</sup>P-b-11 or 5'-<sup>32</sup>P-b-12 was determined based on the specific activity of 5'-<sup>32</sup>P-**S10**.

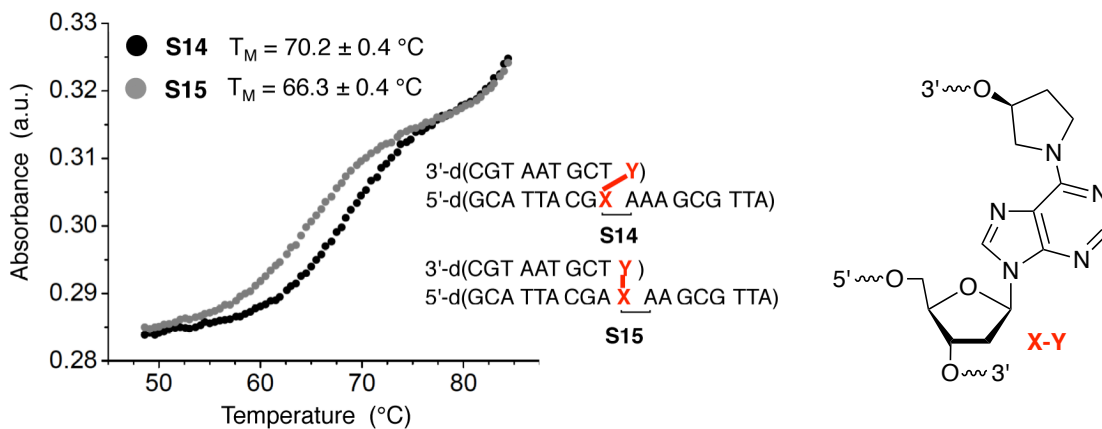

**Figure S3.** UV-melting of DOB ICL analogues S14 and S15.

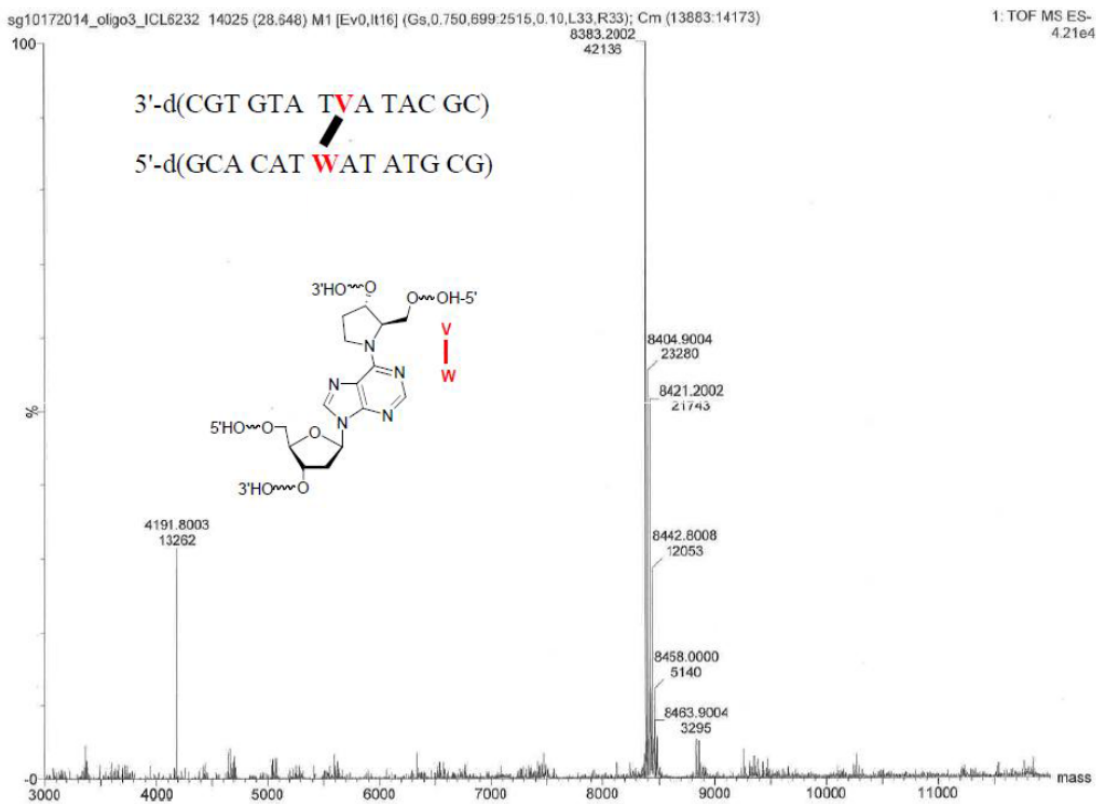

**Figure S4.** ESI-MS of 13. Calc'd mass 8383.464, observed mass 4191.800 ( $z = -2$ ), 8383.200, 8404.900  $[M + Na]^+$ , 8421.200  $[M + K]^+$ , 8442.800  $[M + Na + K]^+$ , 8458.000  $[M + 2K]^+$ , 8463.900  $[M + 2Na + K]^+$ .

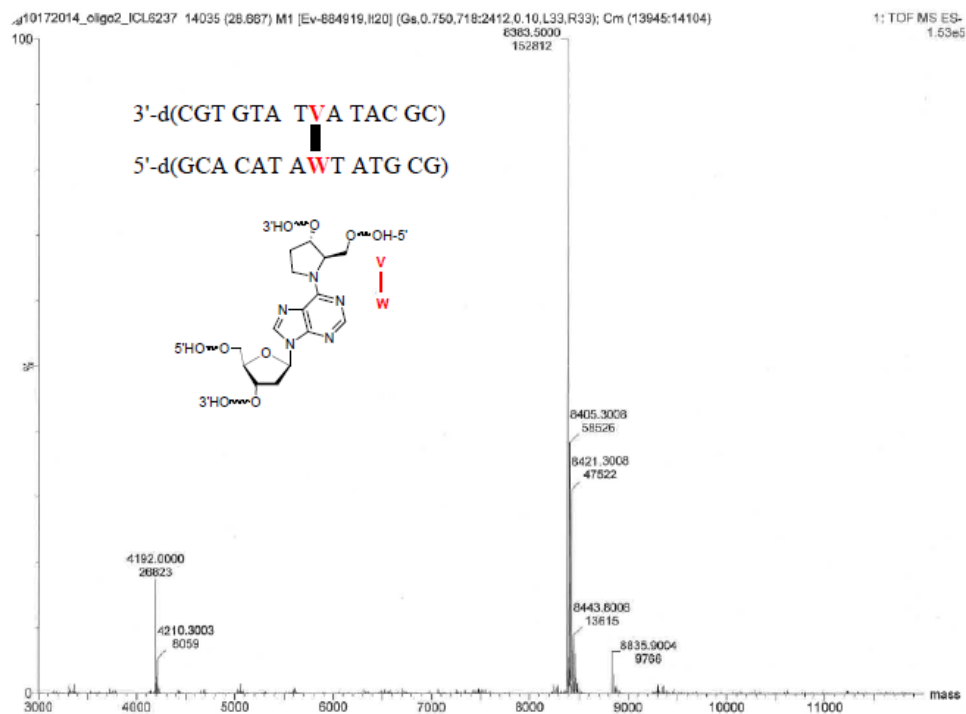

**Figure S5.** ESI-MS of **14**. Calc'd mass 8383.464, observed mass 4192.000 ( $z = -2$ ), 8383.500, 8405.300  $[M + Na]^+$ , 8421.300  $[M + K]^+$ , 8443.800  $[M + Na + K]^+$ .

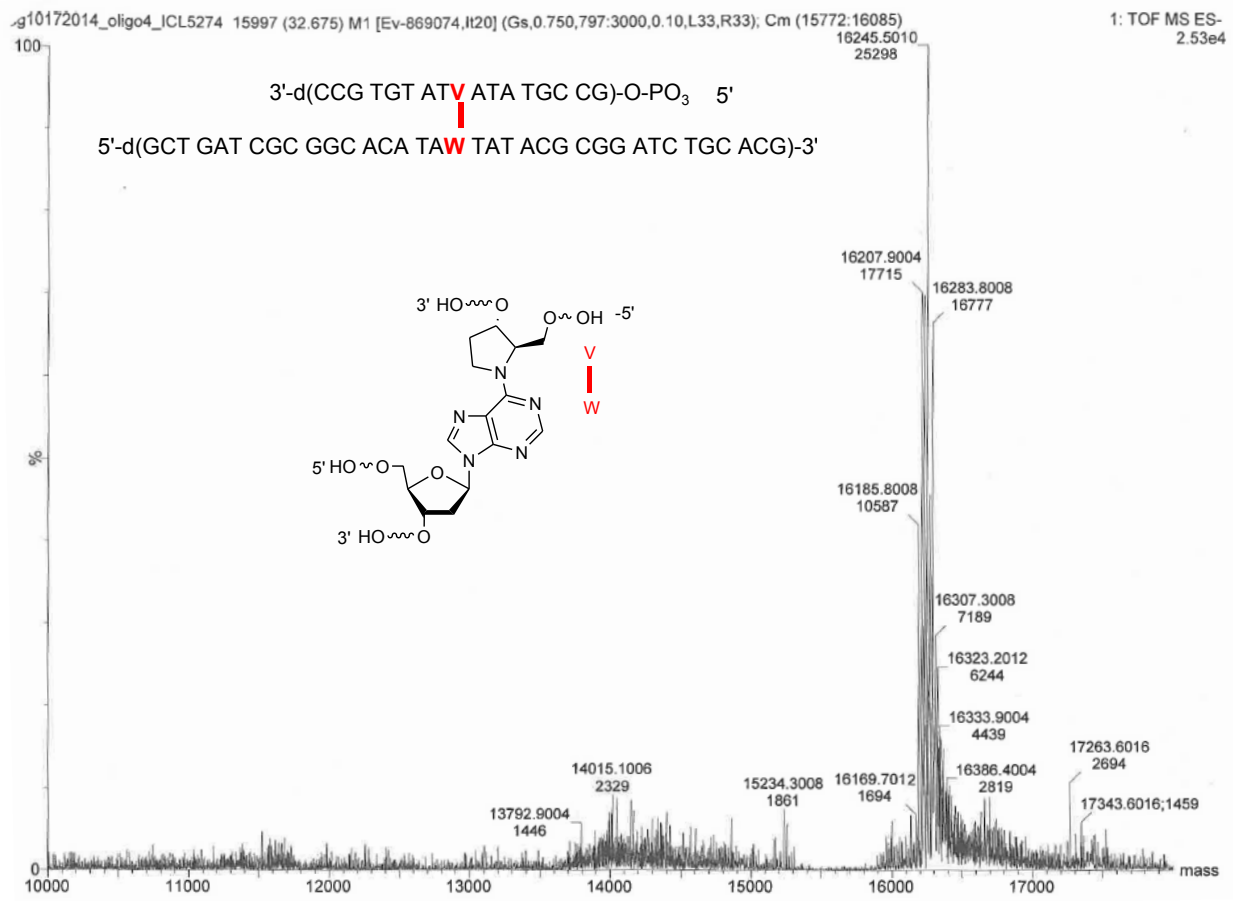

**Figure S6.** ESI-MS of **S6**. Calc'd mass 16182.485, observed mass 16185.800, 16207.900 [M + Na]<sup>+</sup>, 16245.501 [M + Na + K]<sup>+</sup>, 16283.801 [M + Na + 2K]<sup>+</sup>, 16307.300 [M + 2Na + 2K]<sup>+</sup>, 16323.201 [M + Na + 3K]<sup>+</sup>, 16333.900 [M + 3Na + 2K]<sup>+</sup>, 16386.400 [M + 2Na + 4K]<sup>+</sup>.

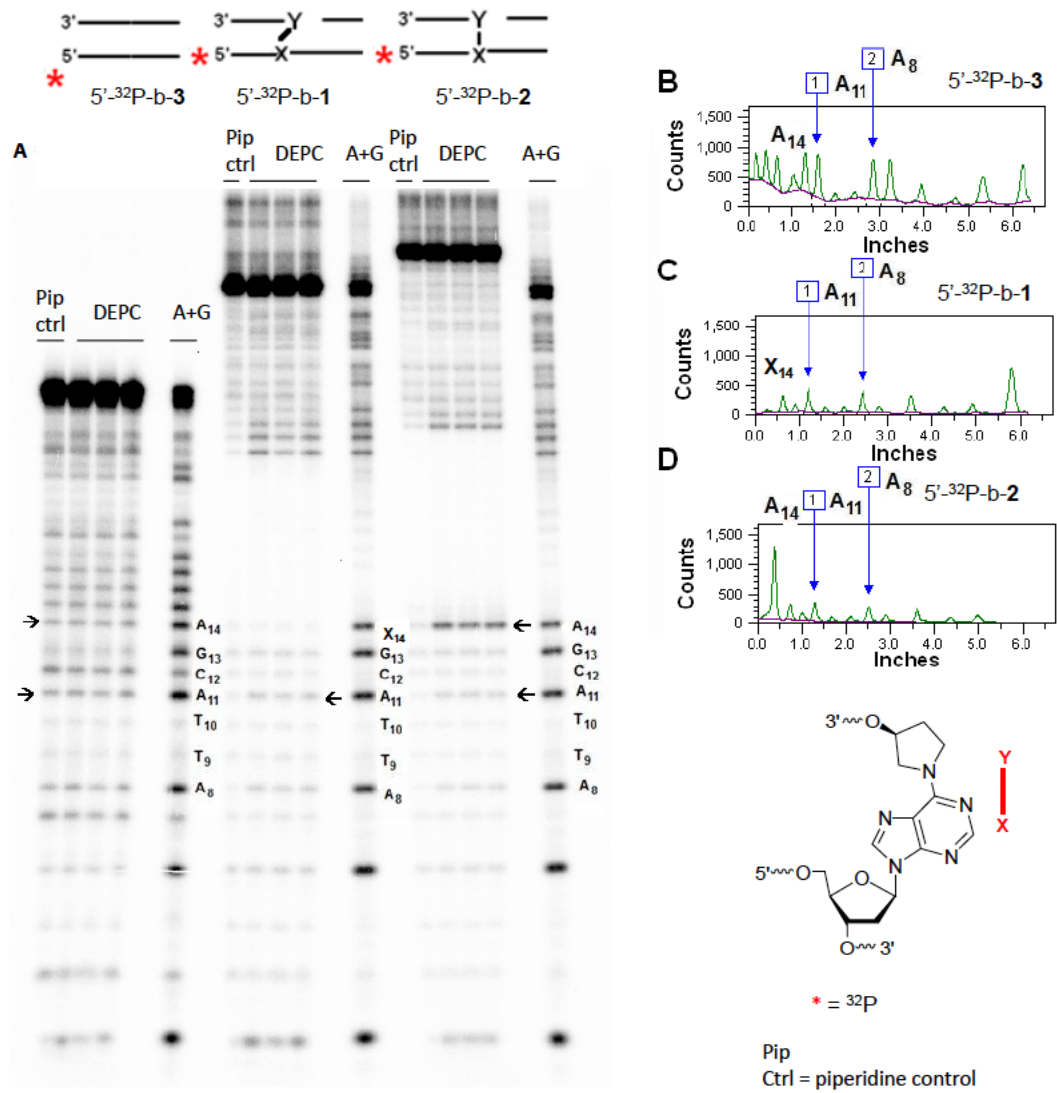

**Figure S7.** Representative autoradiogram of DEPC reaction with 5'- $^{32}\text{P}$ -b-1-3.



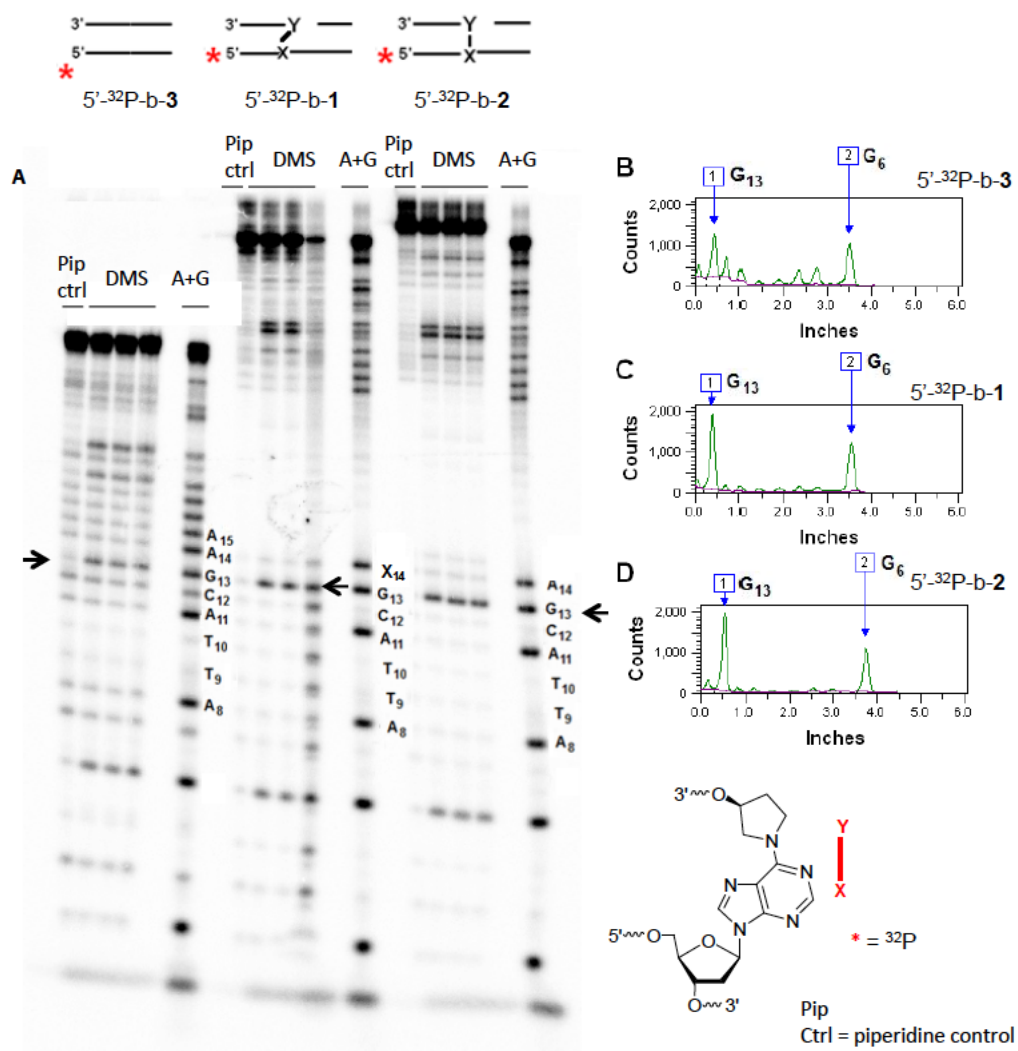

**Figure S8.** Representative autoradiogram of DMS reaction with 5'-<sup>32</sup>P-b-1-3.

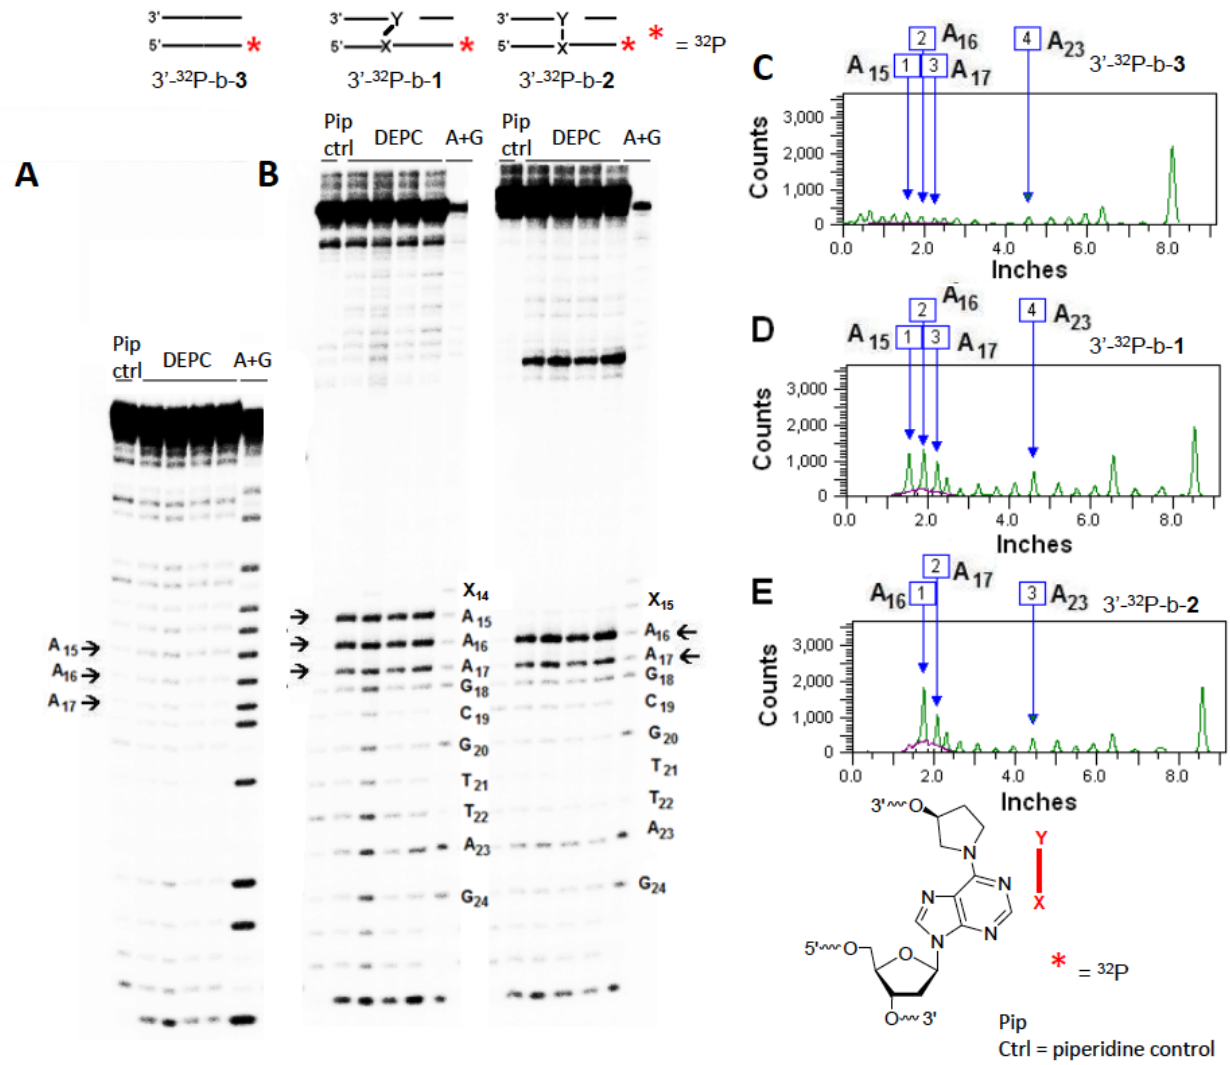

**Figure S9.** Representative autoradiogram of DEPC reaction with  $3'$ - $^{32}\text{P}$ -b-1-3.

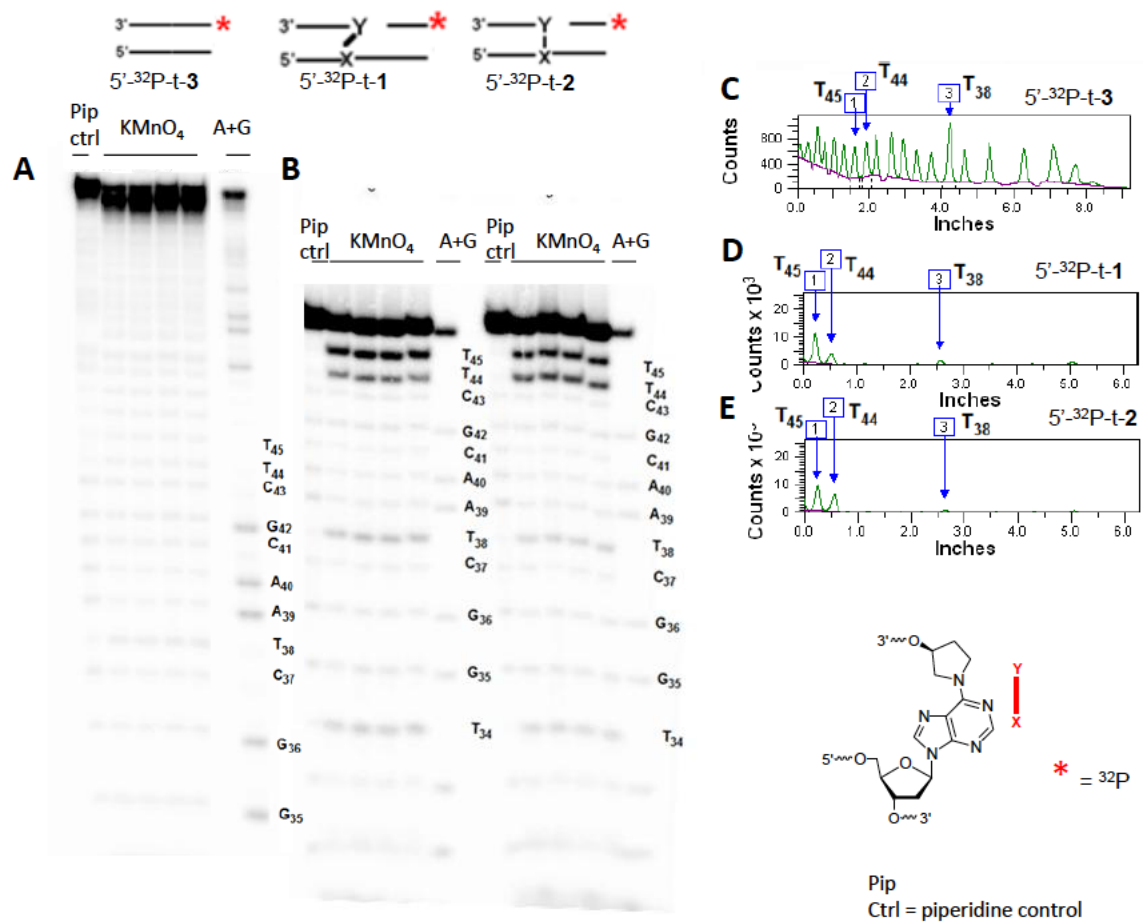

**Figure S10.** Representative autoradiogram of KMnO<sub>4</sub> reaction with 5'-<sup>32</sup>P-t-1-3.

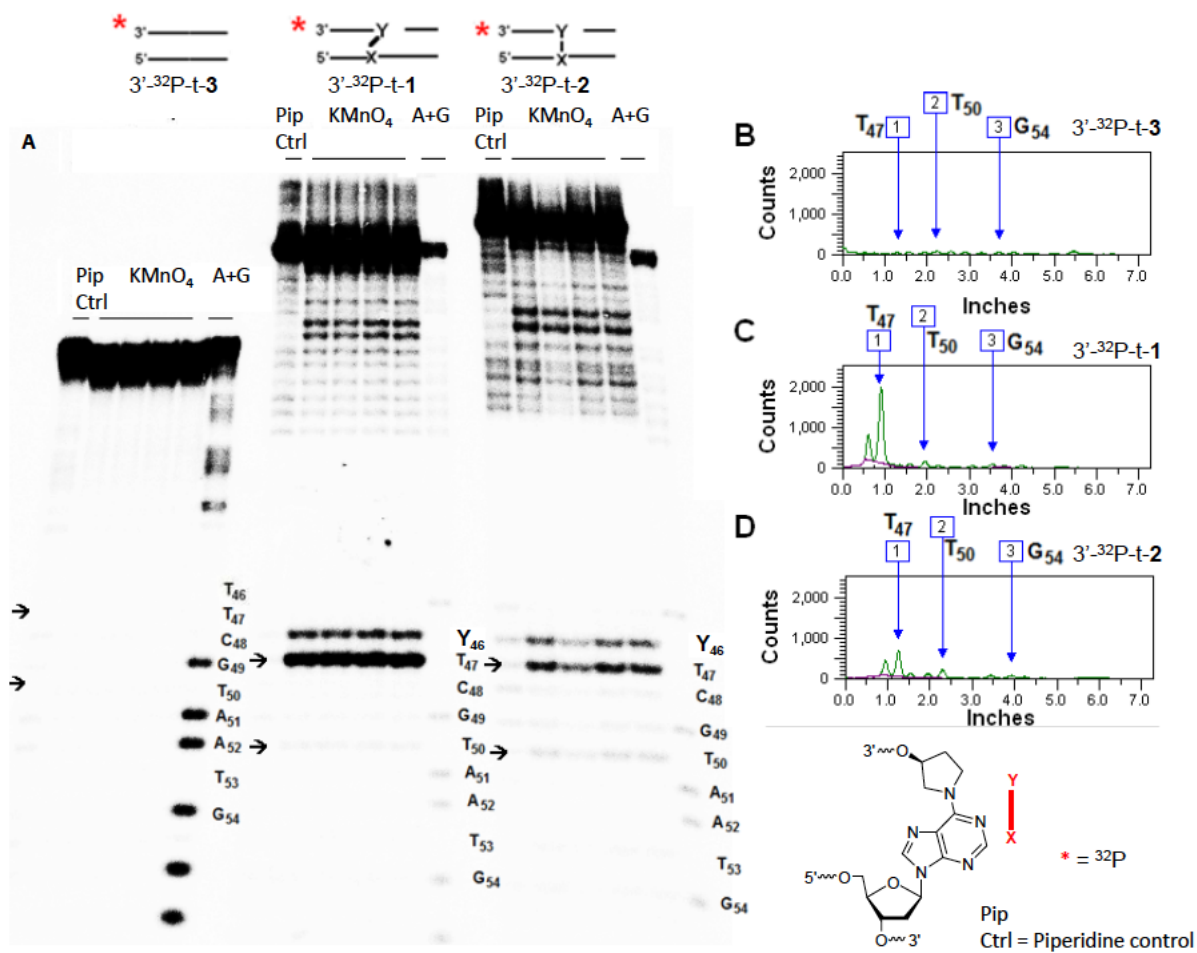

**Figure S11.** Representative autoradiogram of  $\text{KMnO}_4$  reaction with  $3' \text{-}^{32}\text{P-t-1-3}$ .

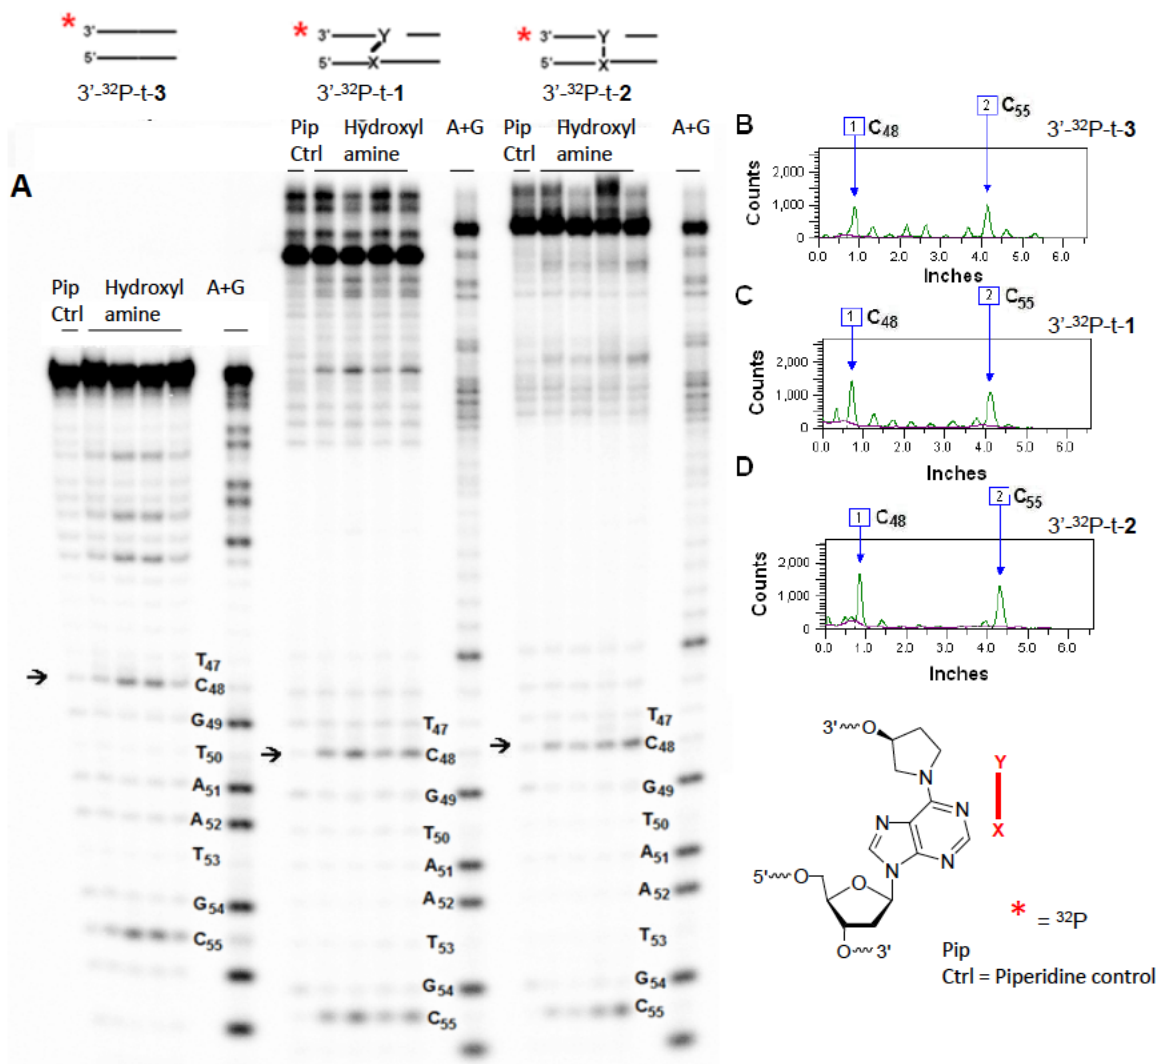

**Figure S12.** Representative autoradiogram of hydroxylamine reaction with  $3'-^{32}\text{P-t-1-3}$ .

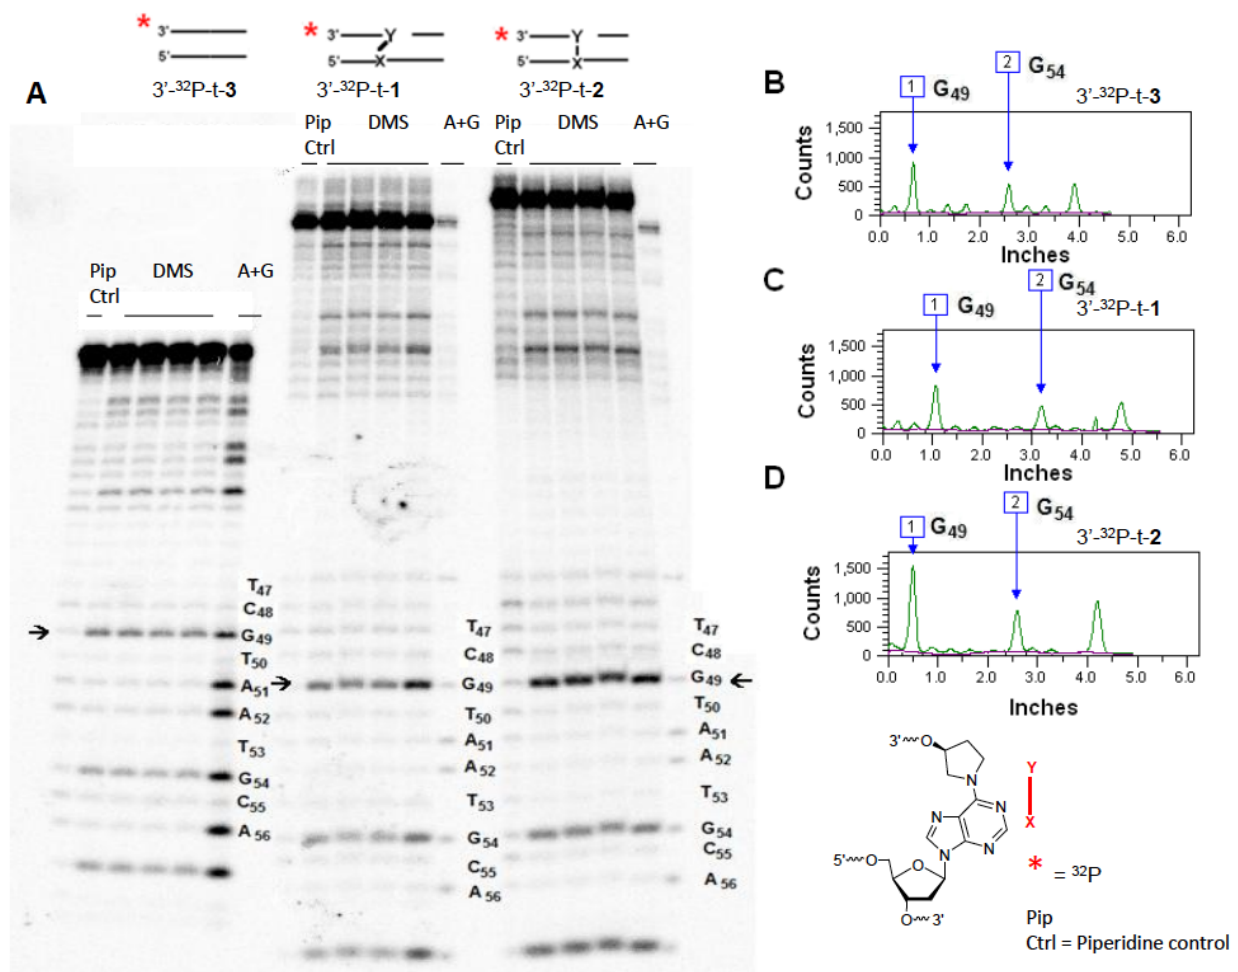

Figure S13. Representative autoradiogram of DMS reaction with  $3' \text{-}^{32}\text{P-t-1-3}$ .

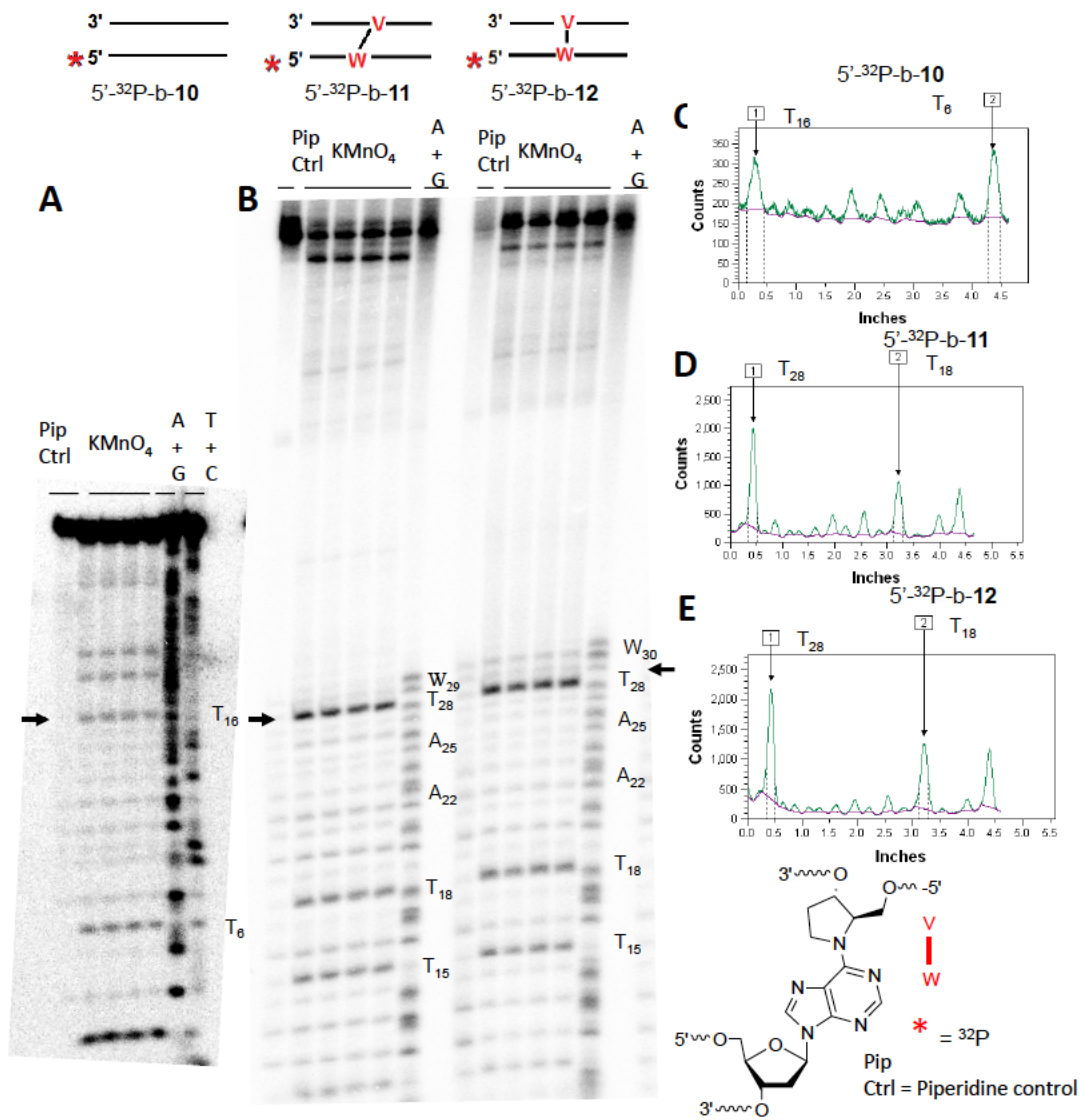

Figure S14. Representative autoradiogram of KMnO<sub>4</sub> reaction with 5'-<sup>32</sup>P-b-10-12.

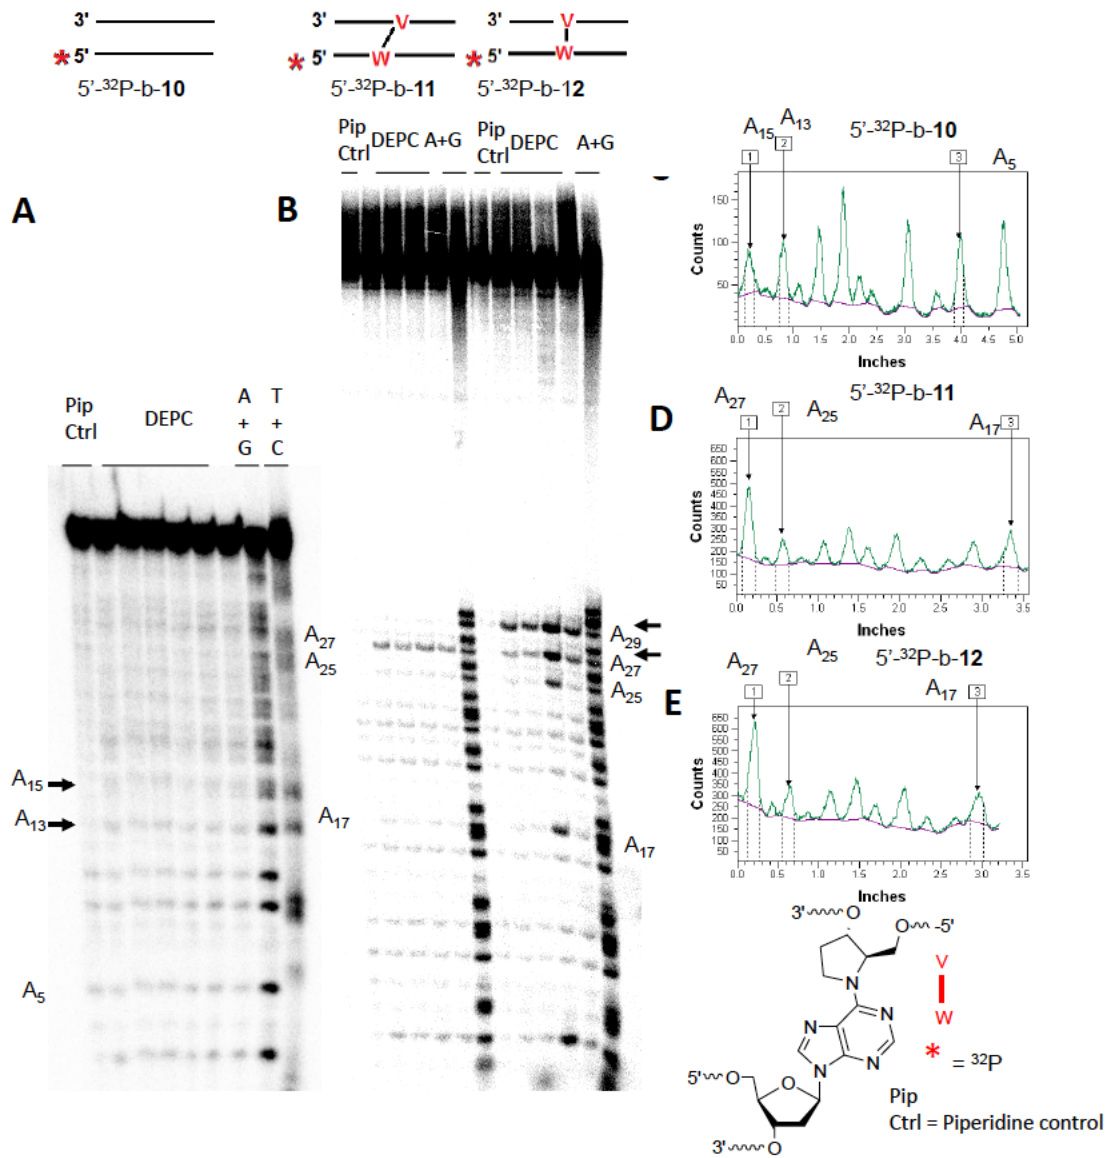

**Figure S15.** Representative autoradiogram of DEPC reaction with 5'-<sup>32</sup>P-b-10-12.



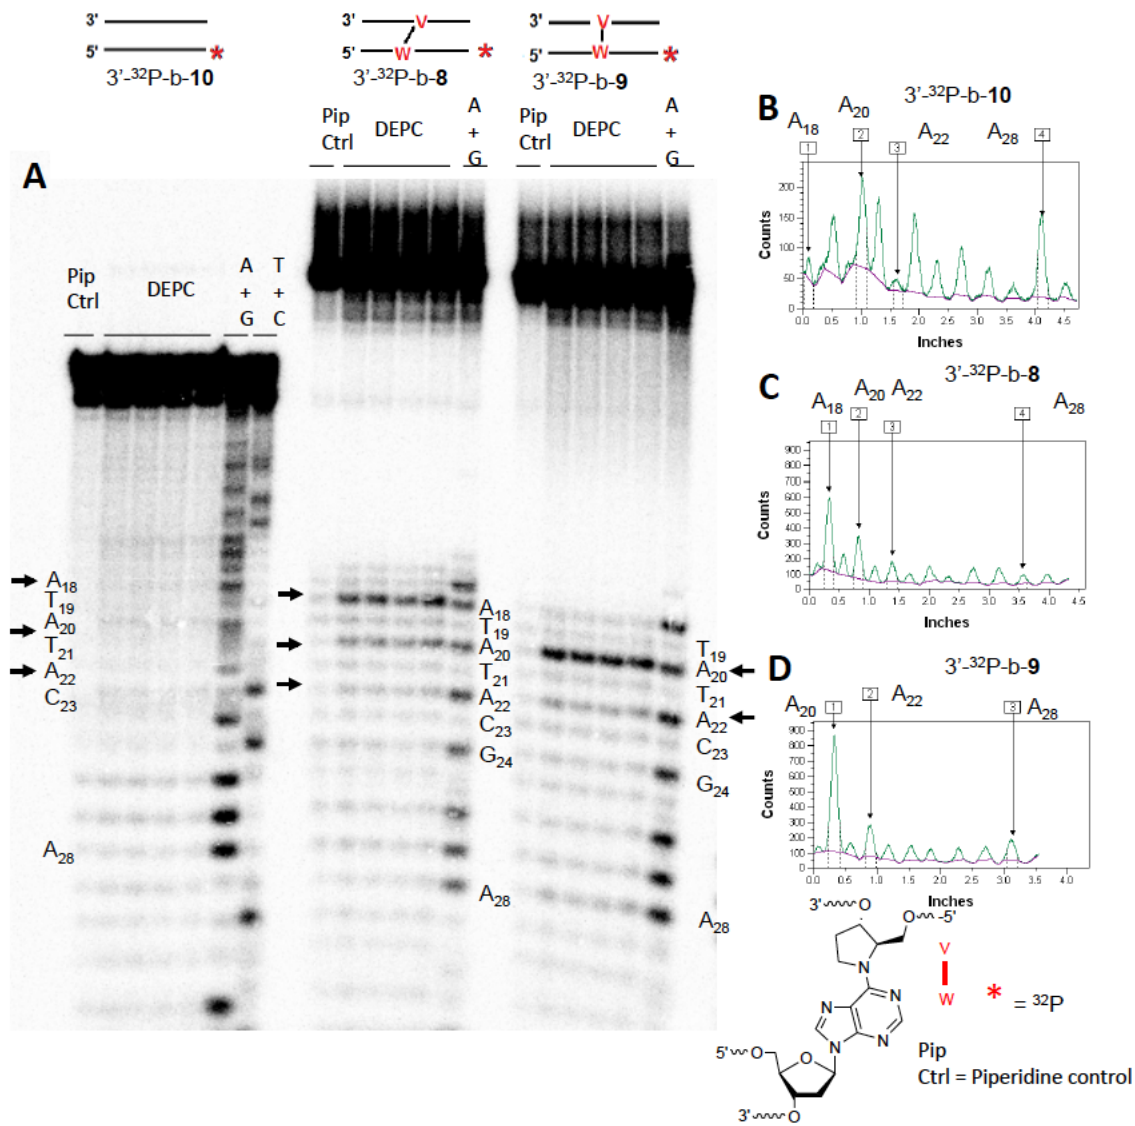

**Figure S16.** Representative autoradiogram of DEPC reaction with  $3'$ - $^{32}\text{P}$ -b-10-12.

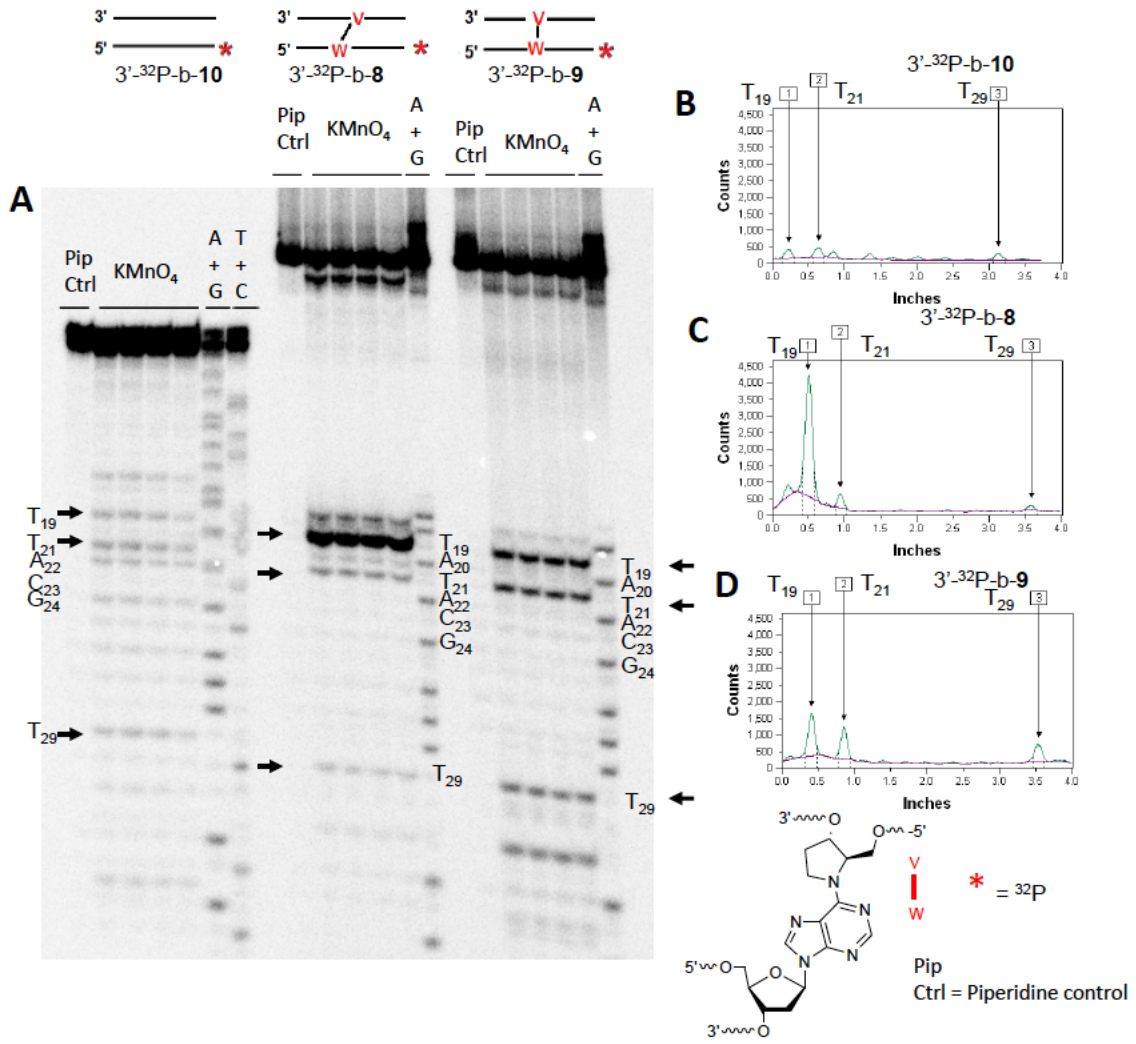

**Figure S17.** Representative autoradiogram of KMnO<sub>4</sub> reaction with 3'-<sup>32</sup>P-b-10-12.

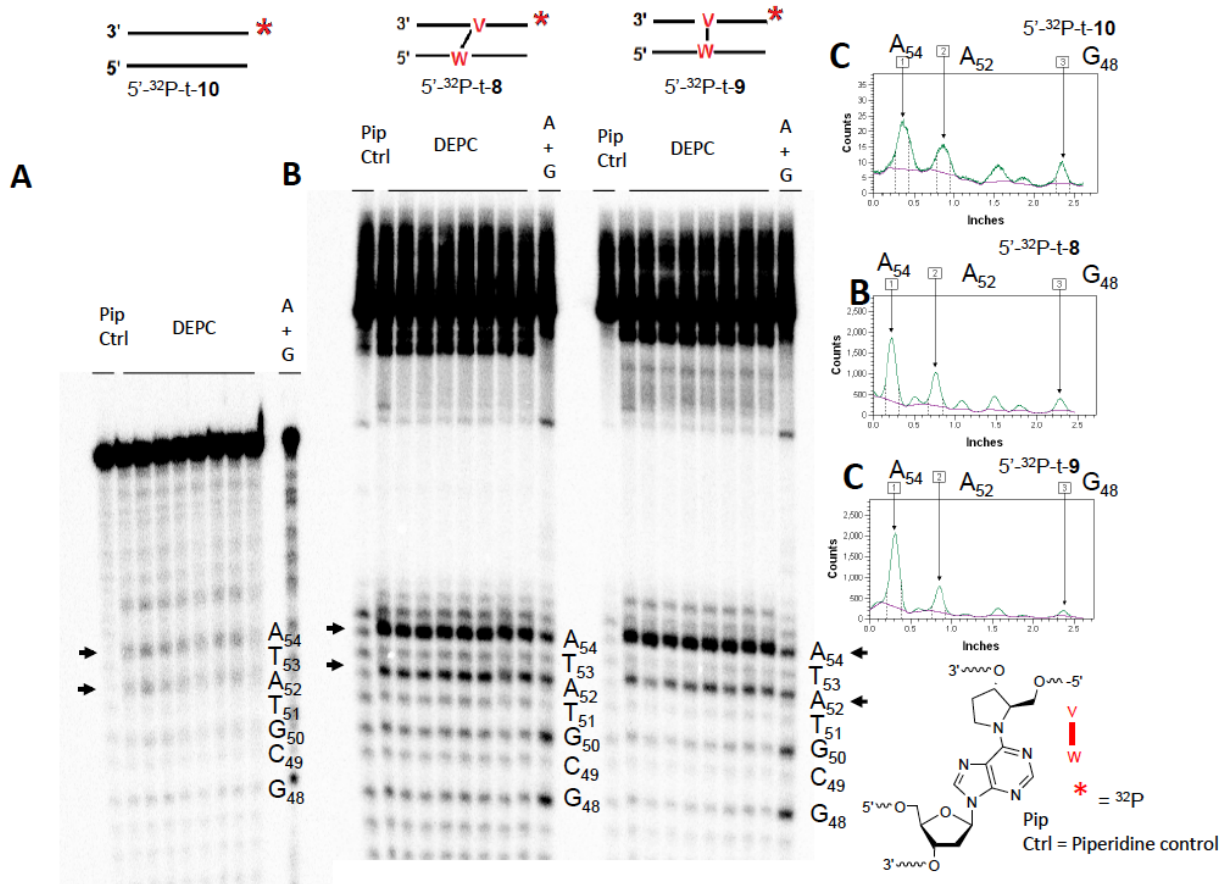

**Figure S18.** Representative autoradiogram of DEPC reaction with 5'-<sup>32</sup>P-t-8-10.

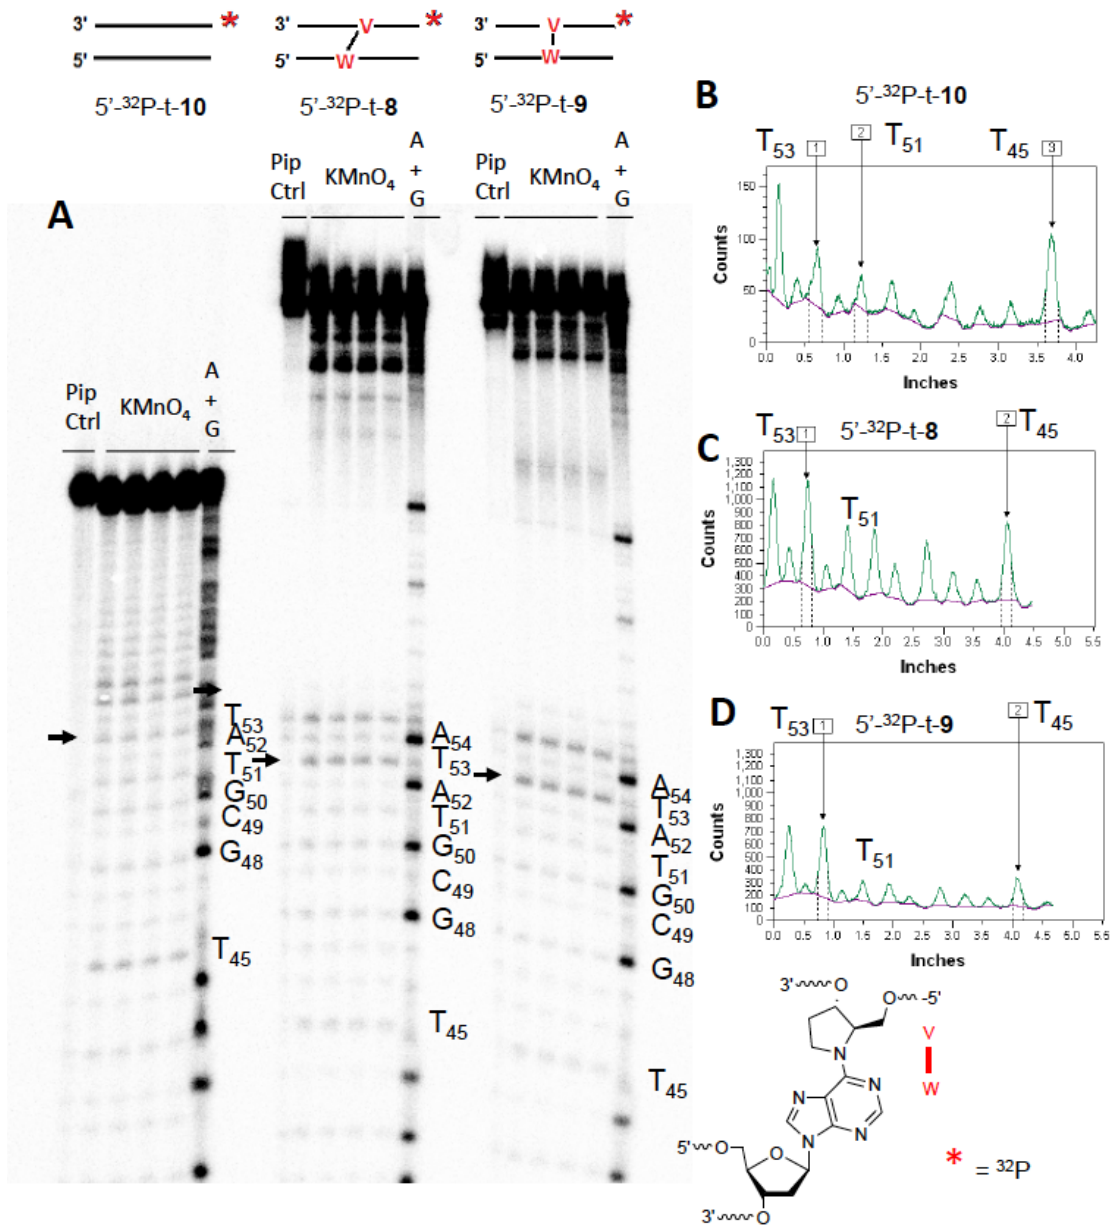

**Figure S19.** Representative autoradiogram of  $\text{KMnO}_4$  reaction with  $5' \text{-}^{32}\text{P-t-8-10}$ .

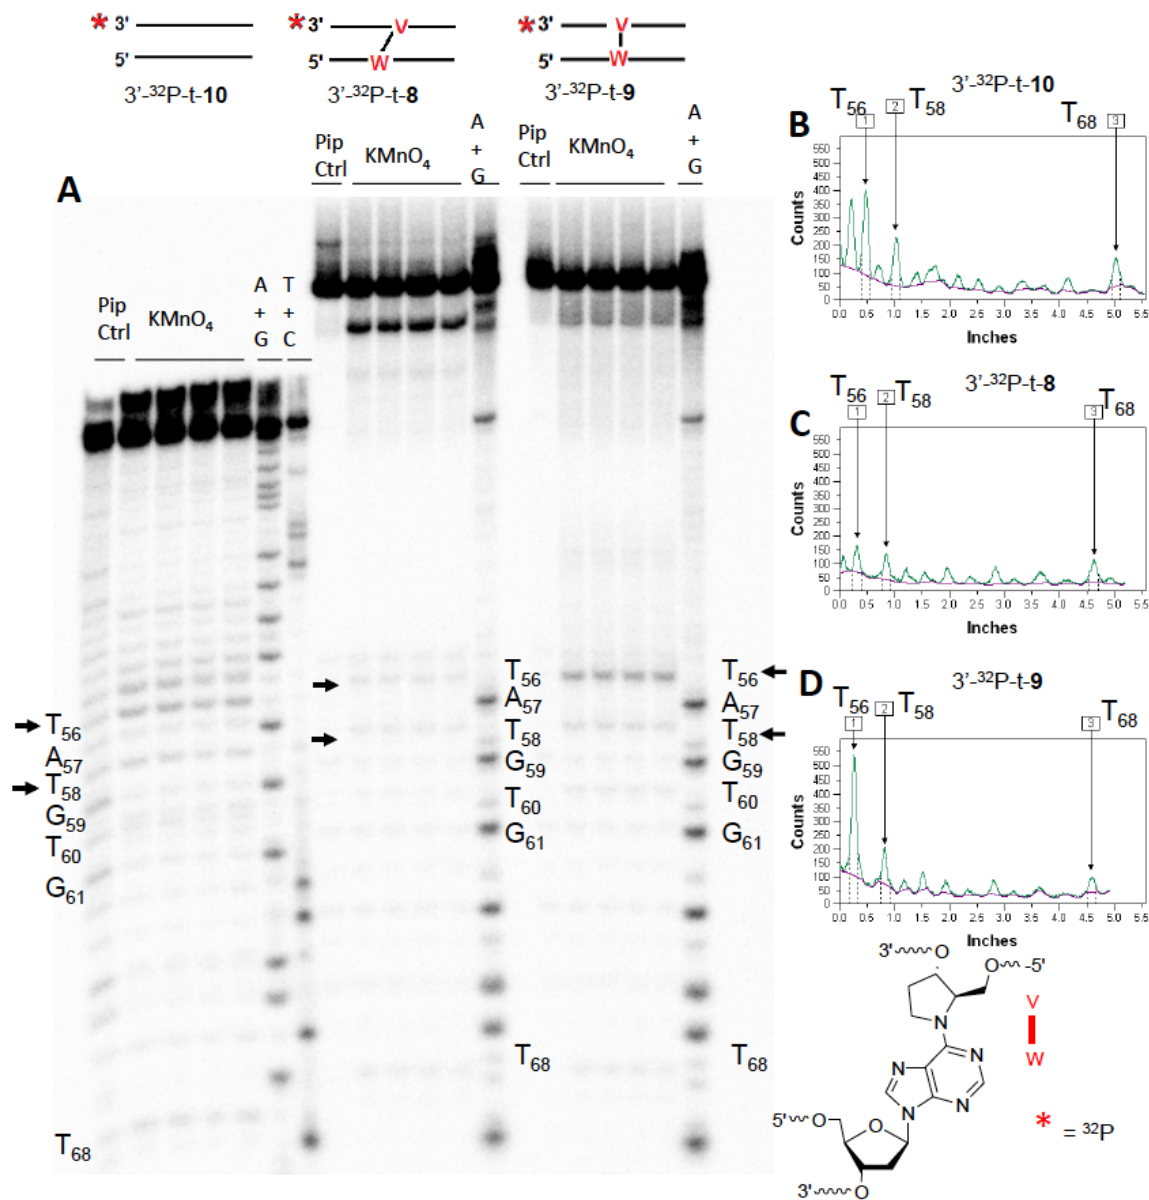

**Figure S20.** Representative autoradiogram of  $\text{KMnO}_4$  reaction with  $3'\text{-}^{32}\text{P}\text{-t-8-10}$ .

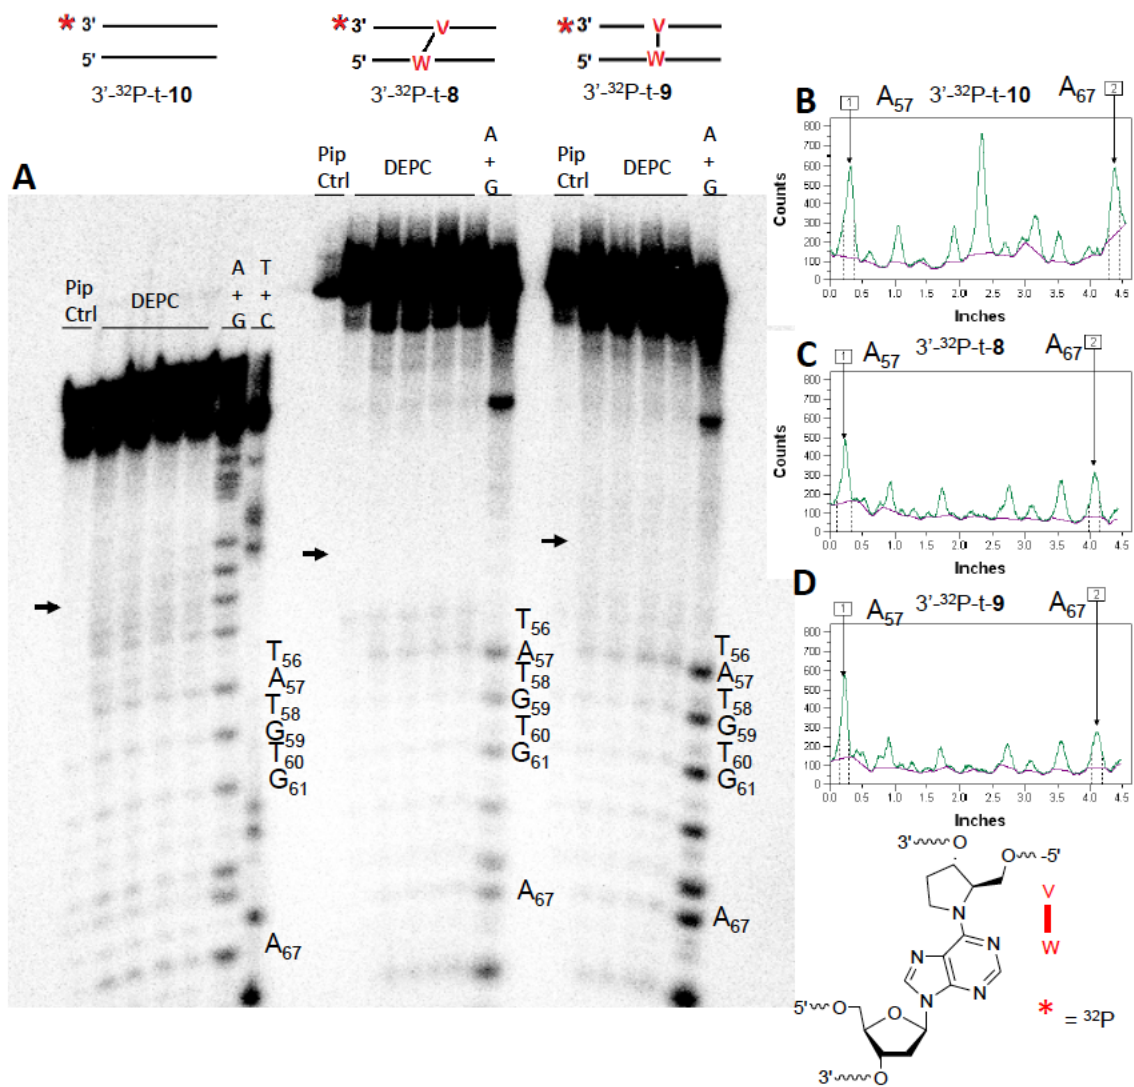

**Figure S21.** Representative autoradiogram of DEPC reaction with 3'-<sup>32</sup>P-t-8-10.

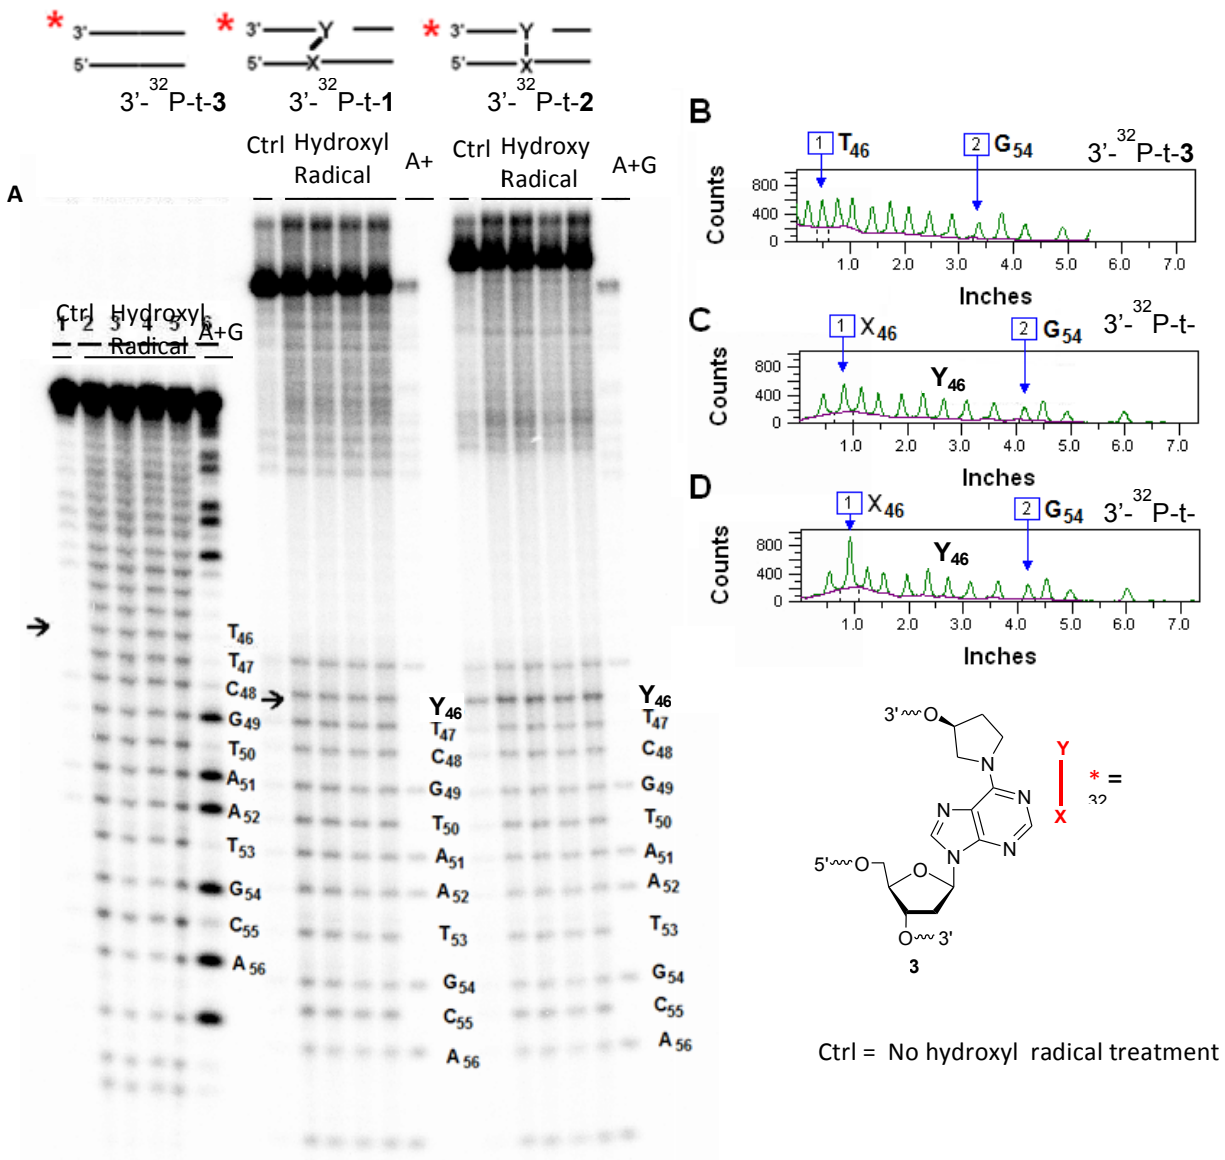

**Figure S22.** Representative autoradiogram of OH• reaction with 3'-<sup>32</sup>P-t-8-10.

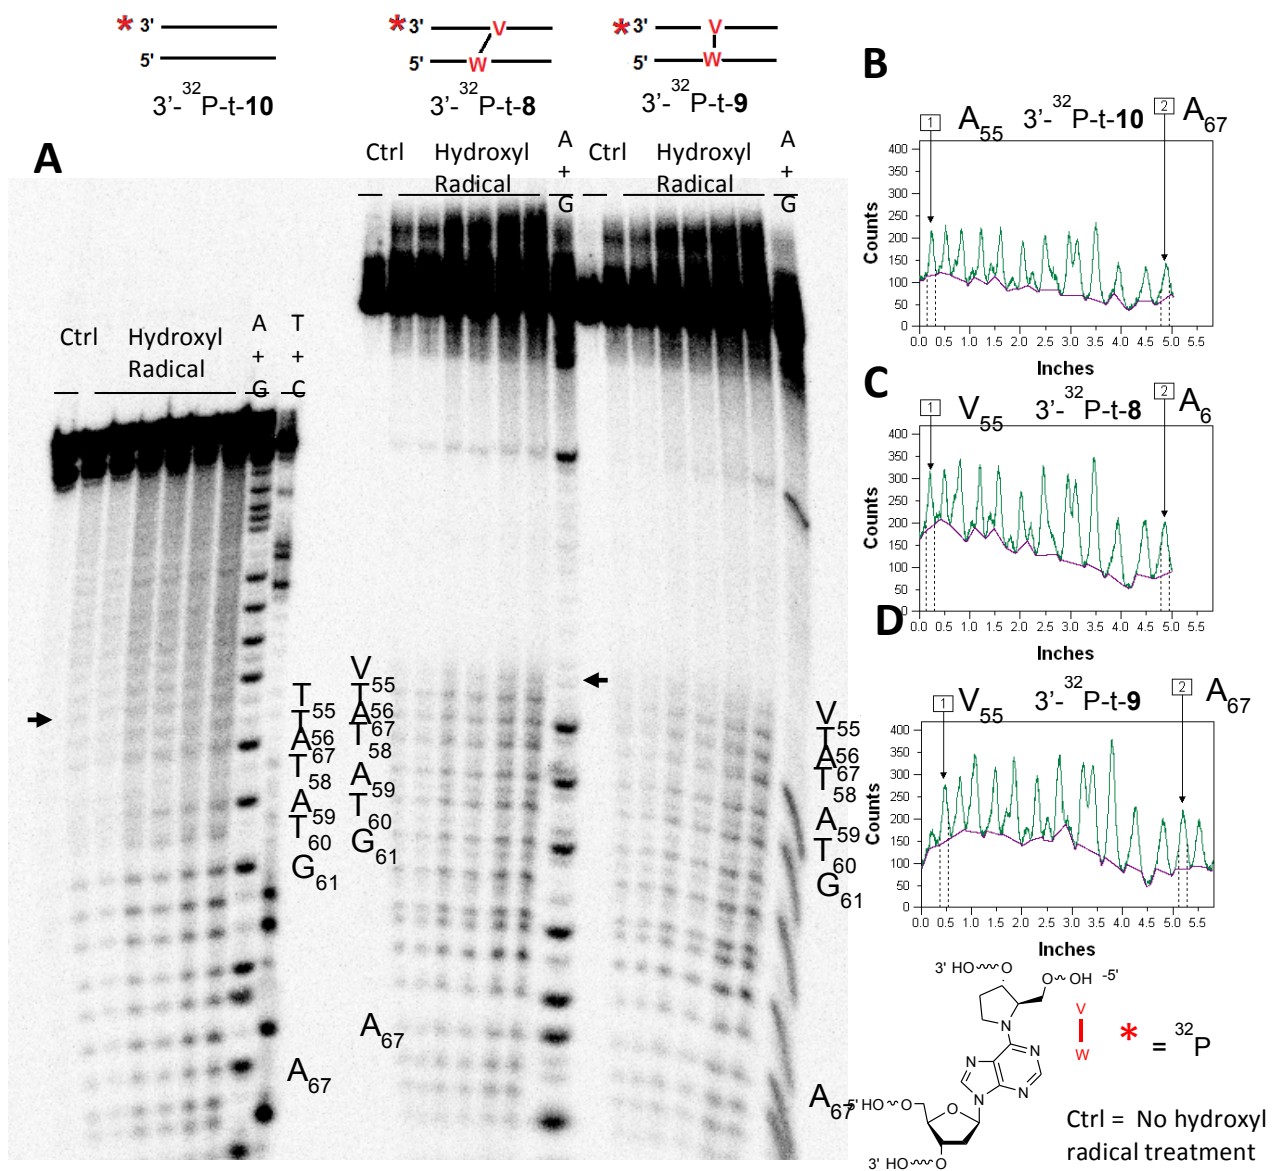

**Figure S23.** Representative autoradiogram of  $\text{OH}\cdot$  reaction with  $3'\text{-}^{32}\text{P-t-8-10}$ .
